# Supplementary material for: Lithiation of palladated dihydropentacene: a new route for the introduction of substituents from both of electrophiles and nucleophiles to pentacene
Source: Royal Society of Chemistry journal article supplement (doi:10.1039/c7cc09535j), 2018-01-01

Supporting Information for

**Lithiation of Palladated Dihydropentacene: New Route for Introduction of Substituents from Both of Electrophiles and Nucleophiles to Pentacene**

**Yanqing Wang, Kiyohiko Nakajima, Zhiyi Song and Tamotsu Takahashi\***

**Content**

|                                                                               |                |
|-------------------------------------------------------------------------------|----------------|
| <b>General Experimental Method</b>                                            | <b>S2</b>      |
| <b>Preparation of 6,13-dibromo-5,14-dihydro-pentacene 1</b>                   | <b>S2</b>      |
| <b>Preparation of palladated dihydropentacene derivative 2</b>                | <b>S2</b>      |
| <b>Preparation of palladated dihydropentacene derivative 3 and lithiation</b> | <b>S3</b>      |
| <b>Reaction of palladated dihydropentacene 3 with electrophiles</b>           | <b>S4-S9</b>   |
| <b>Reaction of palladated dihydropentacene 2 with electrophiles</b>           | <b>S9-S10</b>  |
| <b>Reaction of palladated dihydropentacene 16 with nucleophiles</b>           | <b>S10-S15</b> |
| <b>Reference</b>                                                              | <b>S15</b>     |
| <b>X-ray analysis data for compound 2</b>                                     | <b>S16</b>     |
| <b><math>H^1</math> and <math>C^{13}</math> NMR Spectra</b>                   | <b>S17-S38</b> |



**2:**  $^1\text{H}$  NMR ( $\text{CDCl}_3$ ,  $\text{Me}_4\text{Si}$ )  $\delta$  3.62 (s, 2 H), 4.08 (s, 2 H), 6.68 (d,  $J = 7.8$  Hz, 1 H), 6.97 (t,  $J = 7.8$  Hz, 1 H), 6.96-7.10 (m, 12 H), 7.09 (t,  $J = 7.8$  Hz, 1 H), 7.17-7.20 (m, 7 H), 7.32-7.39 (m, 14 H), 7.67 (d,  $J = 8.4$  Hz, 1 H), 7.89 (d,  $J = 7.8$  Hz, 1 H), 8.33 (s, 1 H), 9.40 (s, 1 H).  $^{13}\text{C}$  NMR ( $\text{CDCl}_3$ ,  $\text{Me}_4\text{Si}$ )  $\delta$  37.9, 41.4, 118.6, 124.7, 124.9, 125.4, 125.8, 125.9, 126.5, 126.9, 127.5, 127.9, 129.7, 129.9, 130.2, 130.5, 130.7, 130.9, 131.2, 134.4, 134.9, 136.0, 136.4, 136.9, 137.0, 159.1.  $^{31}\text{P}\{^1\text{H}\}$  NMR ( $\text{CDCl}_3$ )  $\delta$  24.15. HRMS (FAB) calcd for  $\text{C}_{58}\text{H}_{44}\text{Br}_2\text{P}_2\text{Pd}$ : 1068.0322. Found: 1068.0358.

### Preparation of palladated dihydropentacene **3**.

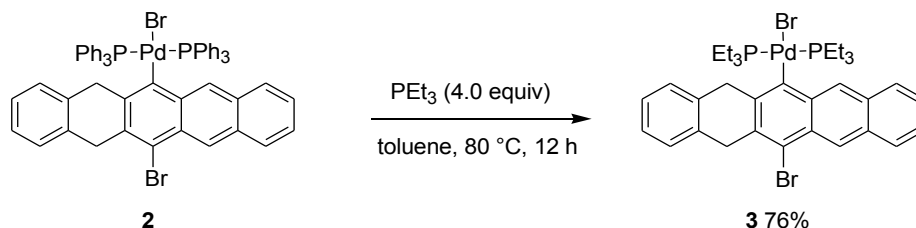

In a 20 mL Schlenk tube, palladated dihydropentacene **2** (91 mg, 0.085 mmol) was dissolved in toluene (5 mL), and  $\text{PEt}_3$  (0.36 mL, 0.34 mmol) was added at room temperature. Under nitrogen atmosphere, the mixture was stirred at 80 °C for 12 h. The solvent was evaporated to give a solid. Purification with a flash chromatography (silica gel, hexane: ethyl acetate = 5:1 as eluent) afforded the title compound **3** (50 mg, 76% isolated yield) as a green solid.

**3**  $^1\text{H}$  NMR ( $\text{CDCl}_3$ ,  $\text{Me}_4\text{Si}$ )  $\delta$  0.94-1.02 (m, 18 H), 1.35-1.53 (m, 12 H), 4.34 (s, 2 H), 4.49 (s, 2 H), 7.23-7.25 (m, 2 H), 7.32-7.35 (m, 1 H), 7.41-7.44 (m, 1 H), 7.45-7.50 (m, 2 H), 7.93 (d,  $J = 7.2$  Hz, 1 H), 8.07 (d,  $J = 7.2$  Hz, 1 H), 8.80 (s, 1 H), 9.37 (s, 1 H).  $^{13}\text{C}$  NMR ( $\text{CDCl}_3$ ,  $\text{Me}_4\text{Si}$ )  $\delta$  8.4, 15.6, 38.3, 42.3, 118.9, 125.4, 125.4, 126.0, 126.4, 126.4, 126.6, 127.5, 127.6, 128.4, 130.3, 130.4, 131.4, 131.8, 134.4, 136.4, 137.2, 137.2, 137.5, 153.9.  $^{31}\text{P}\{^1\text{H}\}$  NMR ( $\text{CDCl}_3$ )  $\delta$  14.37. HRMS (FAB) calcd for  $\text{C}_{34}\text{H}_{44}\text{Br}_2\text{P}_2\text{Pd}$ : 780.0314. Found: 780.0302.

### Preparation of palladated dihydropentacene **4** from **3**

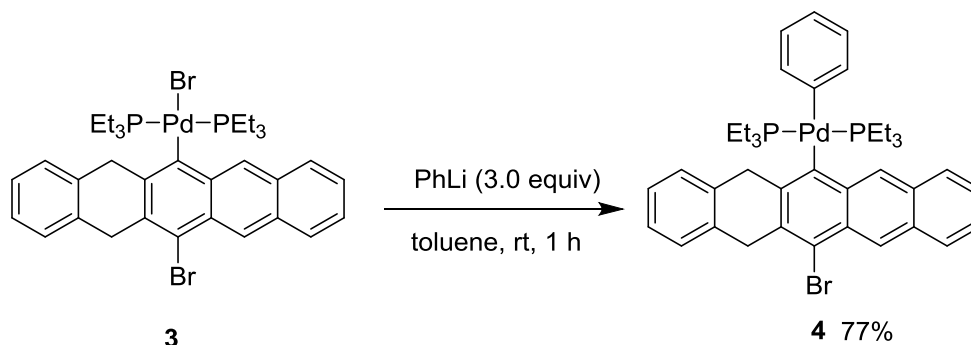

In a 20 mL Schlenk tube, palladated dihydropentacene **3** (16 mg, 0.02 mmol) was dissolved in toluene (2 mL). After the solution was cooled to -78 °C, phenyllithium (0.042 mL, 0.06 mmol) was added dropwise. After which, remove the cooling bath, the mixture was then stirred for 1 h at room temperature. The mixture was quenched by addition with methanol. The solvent was evaporated, and

the resulting solids were purified by a flash chromatography (silica gel, hexane: ethyl acetate =5:1 as eluent) to afford the title compound **4** (12 mg, 77% isolated yield).

**4:**  $^1\text{H}$  NMR ( $\text{CDCl}_3$ ,  $\text{Me}_4\text{Si}$ , 600M)  $\delta$  0.90 (t,  $J = 7.8$  Hz, 18 H), 1.00-1.05 (m, 6 H), 1.14-1.20 (m, 6 H), 4.08 (s, 2 H), 4.40 (s, 2 H), 4.52 (s, 2 H), 6.99 (t,  $J = 7.2$  Hz, 2 H), 7.12-7.17 (m, 4 H), 7.22-7.24 (m, 4 H), 7.37-7.44 (m, 8 H), 7.76 (d,  $J = 7.2$  Hz, 2 H), 7.79 (d,  $J = 7.2$  Hz, 2 H), 7.96 (d,  $J = 7.8$  Hz, 2 H), 8.08 (d,  $J = 7.8$  Hz, 2 H), 8.79 (s, 2 H), 9.44 (s, 2 H).  $^{13}\text{C}$  NMR ( $\text{CDCl}_3$ ,  $\text{Me}_4\text{Si}$ , 600M)  $\delta$  8.4, 15.2, 38.7, 43.0, 118.5, 122.1, 124.4, 124.7, 125.4, 126.0, 126.1, 126.7, 126.8, 126.9, 127.6, 127.8, 128.6, 129.9, 130.7, 131.5, 133.1, 133.7, 137.3, 138.6, 138.7, 138.8, 139.7, 141.4, 168.0, 169.4.  $^{31}\text{P}\{^1\text{H}\}$  NMR ( $\text{CDCl}_3$ )  $\delta$  10.13. HRMS (ESI) calcd for  $\text{C}_{40}\text{H}_{49}\text{BrP}_2\text{Pd}$ : 776.1528. Found: 776.1523.

### Preparation of palladated dihydropentacene **6**

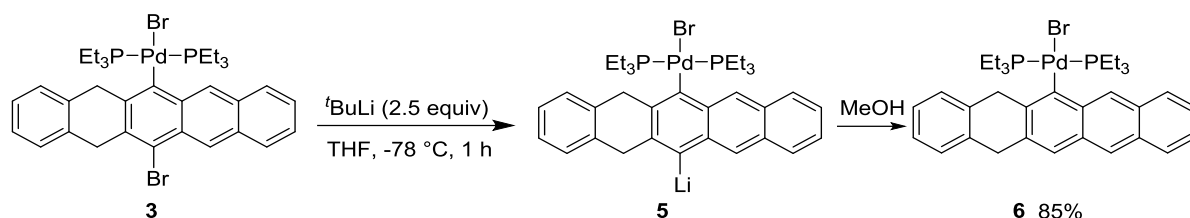

In a 20 mL Schlenk tube, palladated dihydropentacene **3** (60 mg, 0.0768 mmol) was dissolved in THF (2 mL). To the mixture was added  $t\text{-BuLi}$  (0.109 mL, 0.192 mmol) at  $-78^\circ\text{C}$ , and it was stirred at  $-78^\circ\text{C}$  for 1 h to form **5**. After being quenched by methanol, the solvent was evaporated. The resulting solid was purified by a flash chromatography (silica gel, hexane: ethyl acetate =5:1 as eluent) to afford the title compound **6** (46 mg, 85% isolated yield).

**6:**  $^1\text{H}$  NMR ( $\text{CDCl}_3$ ,  $\text{Me}_4\text{Si}$ , 600M)  $\delta$  0.95-1.00 (m, 18 H), 1.37-1.50 (m, 12 H), 4.08 (s, 2 H), 4.44 (s, 2 H), 7.21-7.23 (m, 2 H), 7.33-7.36 (m, 2 H), 7.37-7.43 (m, 2 H), 7.61 (s, 1 H), 7.92 (d,  $J = 7.8$  Hz, 1 H), 7.97 (d,  $J = 7.8$  Hz, 1 H), 8.25 (s, 1 H), 9.28 (s, 1 H).  $^{13}\text{C}$  NMR ( $\text{CDCl}_3$ ,  $\text{Me}_4\text{Si}$ , 600M)  $\delta$  8.5, 15.8, 38.1, 41.8, 121.3, 124.5, 124.9, 125.1, 126.3, 126.3, 127.0, 127.1, 127.9, 128.3, 130.4, 130.8, 131.3, 132.3, 135.3, 137.1, 137.6, 137.9, 153.1.  $^{31}\text{P}\{^1\text{H}\}$  NMR ( $\text{CDCl}_3$ )  $\delta$  14.19. HRMS (ESI) calcd for  $\text{C}_{34}\text{H}_{45}\text{BrP}_2\text{Pd}$ : 702.1219. Found: 702.1204.

### Preparation of palladated dihydropentacene **7**

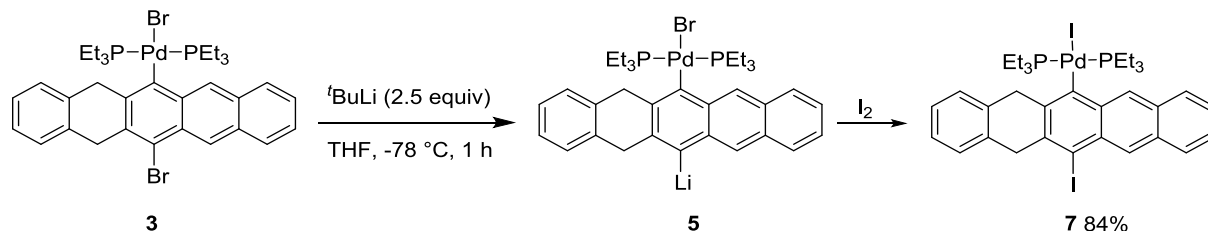

In a 20 mL Schlenk tube, a THF (2 mL) solution of palladated dihydropentacene **3** (68 mg, 0.087 mmol) cooled to  $-78^\circ\text{C}$  was added  $t\text{-BuLi}$  (0.123 mL, 0.22 mmol). Under nitrogen atmosphere, the

mixture was stirred at -78 °C for 1 h. Iodine (67 mg, 0.262 mmol) was added to the mixture solution. After addition, remove the cooling bath, the mixture was stirred for 12 h at room temperature. The reaction solution was quenched by saturated aqueous Na<sub>2</sub>S<sub>2</sub>O<sub>3</sub> solution at 0 °C, extracted with ethyl acetate. The solvent was evaporated and the resulting solids were purified by a flash chromatography (silica gel, hexane: ethyl acetate =5:1 as eluent) to afford the title compound **7** (64 mg, 84% isolated yield).

**7**: <sup>1</sup>H NMR (CDCl<sub>3</sub>, Me<sub>4</sub>Si) δ 0.93-0.98 (m, 18 H), 1.43-1.49 (m, 6 H), 1.54-1.61 (m, 6 H), 4.39 (s, 2 H), 4.45 (s, 2 H), 7.23-7.25 (m, 2 H), 7.32-7.33 (m, 1 H), 7.42-7.49 (m, 3 H), 7.91 (d, *J* = 7.8 Hz, 1 H), 8.09 (d, *J* = 8.4 Hz, 1 H), 8.75 (s, 1 H), 9.27 (s, 1 H). <sup>13</sup>C NMR (CDCl<sub>3</sub>, Me<sub>4</sub>Si) δ 8.5, 16.8, 41.9, 44.9, 100.8, 125.4, 125.5, 126.4, 126.4, 126.5, 127.4, 128.3, 130.4, 131.0, 131.4, 132.1, 132.9, 136.8, 137.3, 137.4, 137.8, 139.2, 157.6. <sup>31</sup>P{<sup>1</sup>H} NMR (CDCl<sub>3</sub>) δ 10.68. HRMS (ESI) calcd for C<sub>34</sub>H<sub>44</sub>I<sub>2</sub>P<sub>2</sub>PdNa: 892.9956[M + Na]<sup>+</sup>. Found: 892.9951[M + Na]<sup>+</sup>.

### Preparation of palladated dihydropentacene **8** from **3**

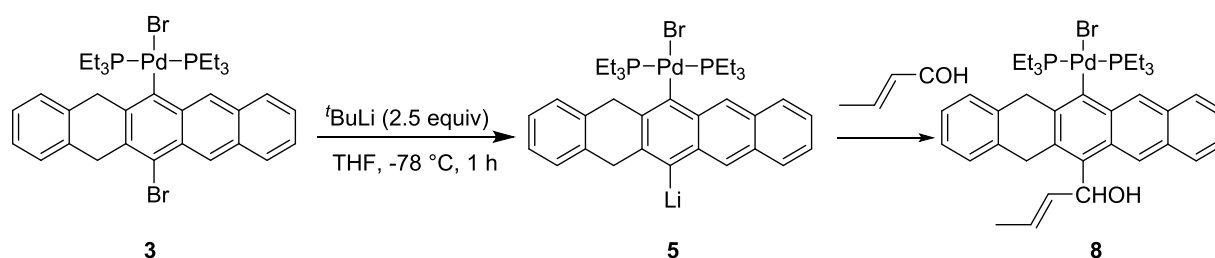

In a 20 mL Schlenk tube, palladated dihydropentacene **3** (22 mg, 0.028 mmol) was dissolved in THF (2 mL). To the mixture was added <sup>t</sup>BuLi (0.04 mL, 0.07 mmol) at -78 °C under a nitrogen atmosphere, and it was stirred at -78 °C for 1 h. Compound crotonaldehyde (0.005 mL, 0.056 mmol) was added to the mixture solution at -78 °C. After which, remove the cooling bath, the mixture was then stirred for 12 h at room temperature. The solution was quenched by methanol. The solvent was evaporated, and the resulting solids were purified by a flash chromatography (silica gel, hexane: ethyl acetate =2:1 as eluent) to afford the title compound **8** (14 mg, 65% isolated yield).

**8**: <sup>1</sup>H NMR (CDCl<sub>3</sub>, Me<sub>4</sub>Si, 600M) δ 0.93-1.00 (m, 18 H), 1.38-1.51 (m, 12 H), 1.69-1.7 (m, 3 H), 2.21 (s, 1 H), 4.16 (d, *J* = 16.8 Hz, 1 H), 4.34 (d, *J* = 16.8 Hz, 1 H), 4.39 (d, *J* = 16.2 Hz, 1 H), 4.59 (d, *J* = 16.2 Hz, 1 H), 5.60-5.64 (m, 1 H), 6.17-6.20 (m, 1 H), 6.46 (m, 1 H), 7.21-7.23 (m, 2 H), 7.33-7.35 (m, 2 H), 7.40-7.43 (m, 2 H), 7.89 (d, *J* = 9 Hz, 1 H), 7.99 (d, *J* = 9 Hz, 1 H), 8.86 (s, 1 H), 9.40 (s, 1 H). <sup>13</sup>C NMR (C<sub>6</sub>D<sub>6</sub>, Me<sub>4</sub>Si, 600M) δ 8.5, 16.1, 17.8, 35.1, 42.8, 70.9, 123.7, 125.2, 125.3, 125.7, 126.5, 126.6, 126.8, 127.5, 129.1, 130.0, 130.4, 130.5, 131.7, 132.1, 134.4, 134.6, 138.1, 138.3, 138.8, 155.1. <sup>31</sup>P{<sup>1</sup>H} NMR (CDCl<sub>3</sub>) δ 12.37. HRMS (FAB) calcd for C<sub>38</sub>H<sub>51</sub>BrOP<sub>2</sub>Pd: 772.1635. Found: 772.1616.

### Preparation of palladated dihydropentacene **9** from **3**

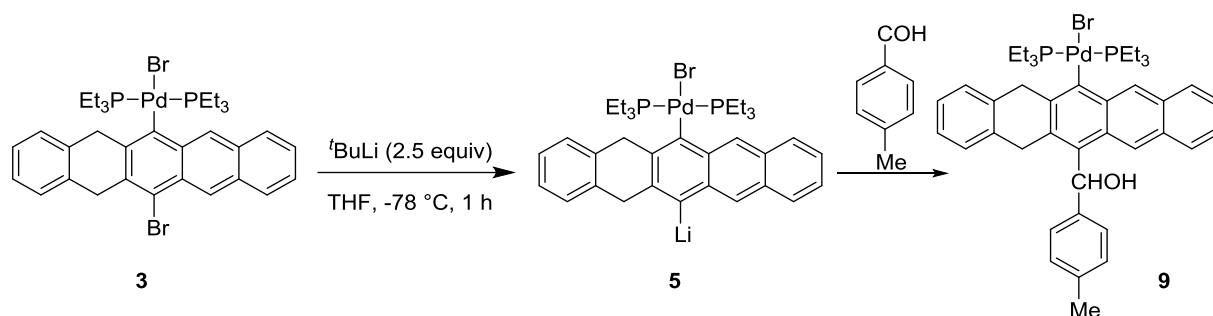

In a 20 mL Schlenk tube, palladated dihydropentacene **3** (21 mg, 0.027 mmol) was dissolved in diethyl ether : toluene (0.5 : 1.5) mL. To the mixture was added  $t\text{BuLi}$  (0.038 mL, 0.068 mmol) at  $-78\text{ }^{\circ}\text{C}$ , and it was stirred at  $-78\text{ }^{\circ}\text{C}$  for 1 h.  $p$ -Tolualdehyde (0.006 mL, 0.054 mmol) was added to the mixture solution at  $-78\text{ }^{\circ}\text{C}$ . Remove the cooling bath, under nitrogen atmosphere, the mixture was stirred for 12 h at room temperature. After that the solution was quenched by methanol. The solvent was evaporated, and the resulting solids were purified by a flash chromatography (silica gel, hexane: ethyl acetate =3:1 as eluent) to afford the title compound **9** (12.2 mg, 58% isolated yield).

**9**:  $^1\text{H}$  NMR ( $\text{C}_6\text{D}_6$ ,  $\text{Me}_4\text{Si}$ , 600M)  $\delta$  0.83-0.89 (m, 18 H), 1.29-1.44 (m, 12 H), 2.03 (br, 1 H), 2.13 (s, 3 H), 4.06 (d,  $J = 16.8\text{ Hz}$ , 1 H), 4.22 (d,  $J = 16.8\text{ Hz}$ , 1 H), 4.54 (d,  $J = 16.2\text{ Hz}$ , 1 H), 4.66 (d,  $J = 16.2\text{ Hz}$ , 1 H), 7.00 (s, 1 H), 7.07-7.10 (m, 3 H), 7.12-7.15 (m, 3 H), 7.25-7.28 (m, 1 H), 7.42 (d,  $J = 7.2\text{ Hz}$ , 1 H), 7.51 (d,  $J = 8.4\text{ Hz}$ , 2 H), 7.77 (d,  $J = 8.4\text{ Hz}$ , 1 H), 8.05 (d,  $J = 8.4\text{ Hz}$ , 1 H), 8.94 (s, 1 H), 9.71 (s, 1 H).  $^{13}\text{C}$  NMR ( $\text{C}_6\text{D}_6$ ,  $\text{Me}_4\text{Si}$ , 600M)  $\delta$  8.6, 16.3, 21.1, 35.1, 42.8, 70.7, 124.0, 125.3, 125.4, 126.2, 126.5, 126.6, 126.7, 127.5, 129.2, 129.2, 130.5, 130.8, 130.9, 131.9, 132.1, 135.4, 136.0, 138.1, 138.2, 138.7, 142.4, 156.0.  $^{31}\text{P}\{^1\text{H}\}$  NMR ( $\text{C}_6\text{D}_6$ , 600M)  $\delta$  12.54. HRMS (ESI) calcd for  $\text{C}_{42}\text{H}_{53}\text{BrONaP}_2\text{Pd}$ : 845.1686. Found: 845.1690.

### Preparation of palladated dihydropentacene **10**

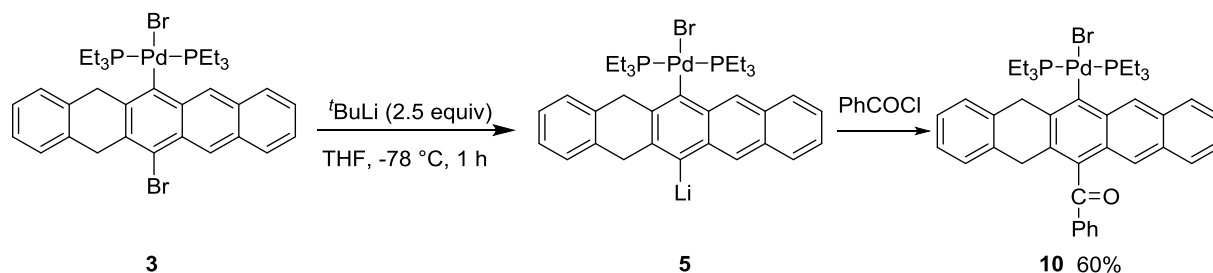

By the same method as described for compound **9** from palladated dihydropentacene **3**. Benzoyl chloride was used instead of  $p$ -tolualdehyde (2 equiv) to form the title compound **10** in 60% isolated yield.

**10**:  $^1\text{H}$  NMR ( $\text{CDCl}_3$ ,  $\text{Me}_4\text{Si}$ , 600M)  $\delta$  1.00-1.05 (m, 18 H), 1.46-1.48 (m, 6 H), 1.54-1.56 (m, 6 H), 3.83 (s, 2 H), 4.52 (s, 2 H), 7.03 (d,  $J = 7.2\text{ Hz}$ , 1 H), 7.14 (t,  $J = 7.2\text{ Hz}$ , 1 H), 7.20 (t,  $J = 7.2\text{ Hz}$ , 1

H), 7.33-7.42 (m, 5 H), 7.57 (t,  $J = 7.2$  Hz, 1 H), 7.78-7.79 (m, 3 H), 7.91 (d,  $J = 8.4$  Hz, 1 H), 8.00 (s, 1 H), 9.41 (s, 1 H).  $^{13}\text{C}$  NMR ( $\text{CDCl}_3$ ,  $\text{Me}_4\text{Si}$ , 600M)  $\delta$  8.5, 15.8, 35.2, 41.8, 123.6, 125.1, 125.3, 126.3, 126.7, 127.1, 127.8, 128.1, 128.7, 128.8, 129.7, 130.0, 130.3, 131.4, 131.9, 133.7, 136.3, 136.5, 137.4, 138.3, 156.8, 200.8.  $^{31}\text{P}\{^1\text{H}\}$  NMR ( $\text{CDCl}_3$ )  $\delta$  12.62; HRMS (ESI) calcd for  $\text{C}_{41}\text{H}_{49}\text{BrOP}_2\text{PdNa}$ : 829.1373[M + Na] $^+$ . Found: 829.1384[M + Na] $^+$ .

### Preparation of palladated dihydropentacene **11**

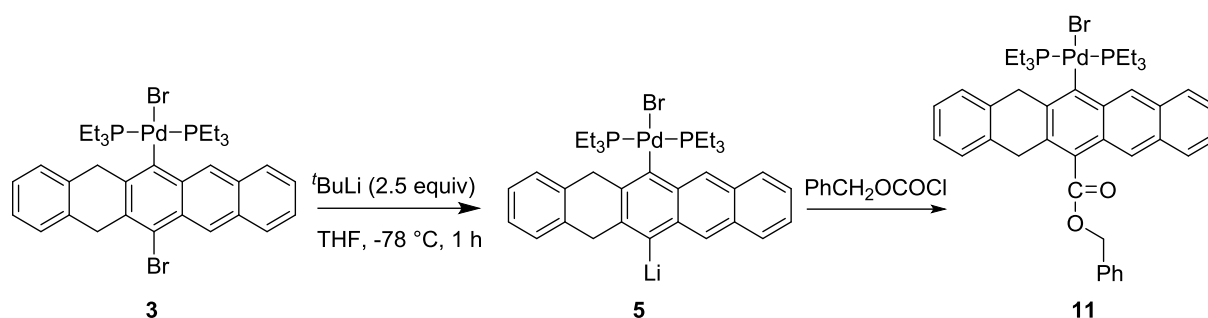

In a 20 mL Schlenk tube, under nitrogen atmosphere, palladated dihydropentacene **3** (17.6 mg, 0.0225 mmol) was dissolved in  $\text{Et}_2\text{O}$ : toluene (0.5 : 1.5) mL. To the mixture was added  $t\text{BuLi}$  (0.032 mL, 0.056 mmol) at  $-78\text{ }^\circ\text{C}$ , and it was stirred at  $-78\text{ }^\circ\text{C}$  for 1 h. Then benzyl chloroformate (0.004 mL, 0.027 mmol) was added to the mixture solution at  $-78\text{ }^\circ\text{C}$ . The solution was warmed to room temperature and stirred for 12 h. The solvent was evaporated, and the resulting solids were purified by a flash chromatography (silica gel, hexane: ethyl acetate = 5:1 as eluent) to afford the title compound **11** (13 mg, 69% isolated yield) as a solid.

**11**:  $^1\text{H}$  NMR ( $\text{CDCl}_3$ ,  $\text{Me}_4\text{Si}$ , 600M)  $\delta$  0.95-1.00 (m, 18 H), 1.36-1.40 (m, 6 H), 1.45-1.49 (m, 6 H), 4.00 (s, 2 H), 4.46 (s, 2 H), 5.65 (s, 2 H), 7.16-7.21 (m, 3 H), 7.30-7.31 (m, 1 H), 7.41-7.50 (m, 5 H), 7.64-7.65 (m, 2 H), 7.82-7.83 (m, 1 H), 7.88-7.90 (m, 1 H), 8.26 (s, 1 H), 9.36 (s, 1 H).  $^{13}\text{C}$  NMR ( $\text{CDCl}_3$ ,  $\text{Me}_4\text{Si}$ , 600M)  $\delta$  8.4, 15.6, 35.4, 41.8, 67.1, 123.1, 124.3, 125.1, 125.3, 126.3, 126.6, 127.2, 127.7, 127.9, 128.2, 128.6, 128.8, 129.2, 130.2, 131.3, 131.5, 133.1, 136.0, 136.1, 136.3, 136.4, 137.3, 158.7, 170.3.  $^{31}\text{P}\{^1\text{H}\}$  NMR ( $\text{CDCl}_3$ )  $\delta$  12.42. HRMS (ESI) calcd for  $\text{C}_{42}\text{H}_{52}\text{BrOP}_2\text{Pd}$ : 837.1640[M + H] $^+$ , Found: 837.1630[M + H] $^+$ .

### Preparation of palladated dihydropentacene **12**

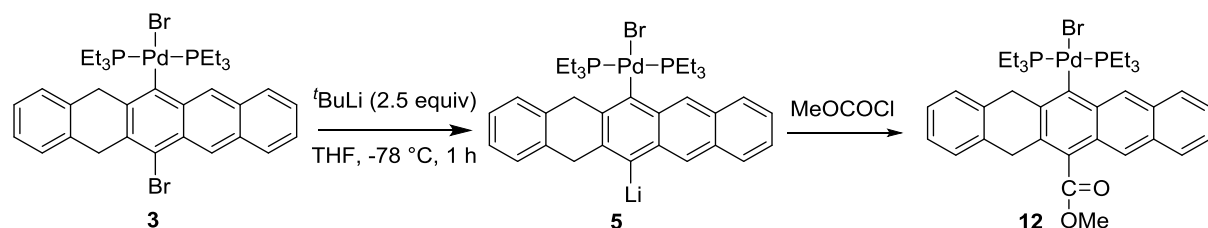

Compound **12** was synthesized by the same way as described for **11** from palladated dihydropentacene **3**. In this reaction methyl chloroformate was used. The title compound **12** was

obtained in 57% isolated yield.

**12:**  $^1\text{H}$  NMR ( $\text{CDCl}_3$ ,  $\text{Me}_4\text{Si}$ , 600M)  $\delta$  0.98 (t,  $J = 7.8$  Hz, 18 H), 1.37-1.42 (m, 6 H), 1.46-1.50 (m, 6 H), 4.08 (s, 2 H), 4.17 (s, 3 H), 4.49 (s, 2 H), 7.22-7.23 (m, 2 H), 7.33-7.34 (m, 2 H), 7.42-7.46 (m, 2 H), 7.90-7.91 (m, 1 H), 7.97-7.98 (m, 1 H), 8.32 (s, 1 H), 9.39 (s, 1 H).  $^{13}\text{C}$  NMR ( $\text{CDCl}_3$ ,  $\text{Me}_4\text{Si}$ , 600M)  $\delta$  8.4, 15.6, 35.6, 41.8, 52.3, 123.1, 124.6, 125.1, 125.4, 126.3, 126.4, 126.6, 127.3, 127.8, 127.9, 128.2, 130.2, 131.4, 131.6, 133.1, 136.2, 136.3, 136.4, 137.3, 158.7, 171.0.  $^{31}\text{P}\{^1\text{H}\}$  NMR ( $\text{CDCl}_3$ )  $\delta$  12.44. HRMS (ESI) calcd for  $\text{C}_{36}\text{H}_{47}\text{BrO}_2\text{P}_2\text{PdNa}$ : 783.1166[M + Na] $^+$ . Found: 783.1171[M + Na] $^+$ .

### Preparation of palladated dihydropentacene **13**

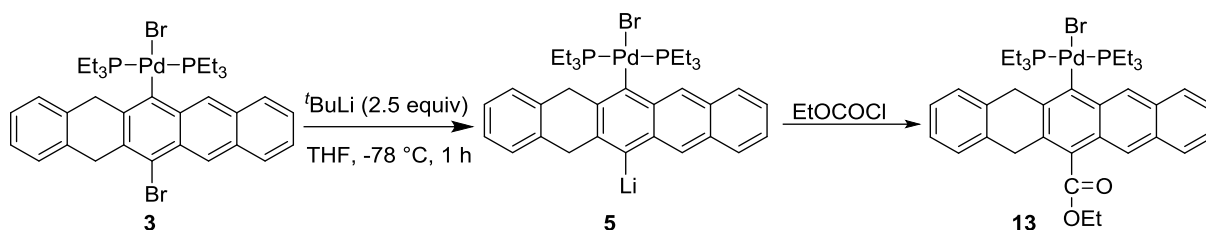

This compound was prepared by same method as described for **11** from complex **3**. Here, electrophilic reagent ethyl chloroformate was used in this reaction. Compound **13** was obtained in 68% isolated yield.

**13:**  $^1\text{H}$  NMR ( $\text{CDCl}_3$ ,  $\text{Me}_4\text{Si}$ , 600M)  $\delta$  0.96-1.01 (m, 18 H), 1.36-1.42 (m, 6 H), 1.45-1.51 (m, 6 H), 1.58 (t,  $J = 7.2$  Hz, 3 H), 4.10 (s, 2 H), 4.48 (s, 2 H), 4.68 (q,  $J = 7.2$  Hz, 2 H), 7.22-7.24 (m, 2 H), 7.32-7.33 (m, 2 H), 7.41-7.45 (m, 2 H), 7.91 (d,  $J = 6.6$  Hz, 1 H), 7.96 (d,  $J = 6.6$  Hz, 1 H), 8.36 (s, 1 H), 9.38 (s, 1 H).  $^{13}\text{C}$  NMR ( $\text{CDCl}_3$ ,  $\text{Me}_4\text{Si}$ , 600M)  $\delta$  8.4, 14.6, 15.6, 35.4, 41.8, 61.3, 123.1, 124.8, 125.1, 125.3, 126.3, 126.3, 126.6, 127.3, 127.8, 127.9, 128.2, 130.2, 131.4, 131.6, 132.9, 136.2, 136.3, 136.5, 137.3, 158.3, 170.5.  $^{31}\text{P}\{^1\text{H}\}$  NMR ( $\text{CDCl}_3$ )  $\delta$  12.45. HRMS (ESI) calcd for  $\text{C}_{37}\text{H}_{49}\text{BrO}_2\text{P}_2\text{PdNa}$ : 797.1322[M + Na] $^+$ . Found: 797.1325[M + Na] $^+$ .

### Preparation of palladated dihydropentacene **14**

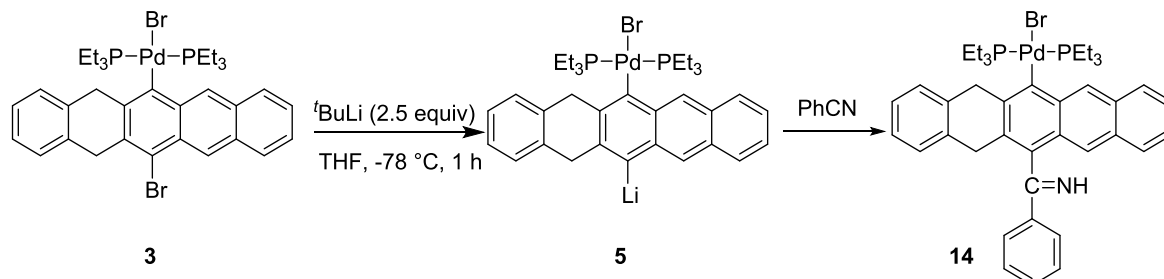

In a 20 mL Schlenk tube, palladated dihydropentacene **3** (22 mg, 0.028 mmol) was dissolved in THF (2 mL). To the mixture was added  $t\text{BuLi}$  (0.039 mL, 0.069 mmol) at  $-78$   $^{\circ}\text{C}$ , and it was stirred at  $-78$   $^{\circ}\text{C}$  for 1 h. Then benzonitrile (0.006 mL, 0.055 mmol) was added to the mixture solution at  $-78$   $^{\circ}\text{C}$  and stirred for 2 h. After being quenched by methanol, the solvent was evaporated. The resulting



solids were purified by a flash chromatography (silica gel, hexane: ethyl acetate =3:1 as eluent) to afford the title compound **14** (11 mg, 50% isolated yield).

**14:**  $^1\text{H}$  NMR ( $\text{CDCl}_3$ ,  $\text{Me}_4\text{Si}$ , 600M)  $\delta$  0.96-0.1.07 (m, 18 H), 1.43-1.58 (m, 12 H), 3.74-3.96 (m, 2 H), 4.50-4.51 (m, 2 H), 7.09 (d,  $J = 7.2$  Hz, 1 H), 7.15 (t,  $J = 7.2$  Hz, 1 H), 7.21 (t,  $J = 7.2$  Hz, 1 H), 7.30-7.34 (m, 3H), 7.36-7.44 (m, 3 H), 7.72-7.73 (m, 2 H), 7.81 (d,  $J = 8.4$  Hz, 1 H), 7.91 (d,  $J = 8.4$  Hz, 1 H), 8.09 (s, 1 H), 9.39 (s, 1 H).  $^{13}\text{C}$  NMR ( $\text{CDCl}_3$ ,  $\text{Me}_4\text{Si}$ , 600M)  $\delta$  8.4, 8.5, 15.8 (q,  $J = 13$  Hz), 35.2, 41.9, 123.8, 125.1, 125.2, 126.3, 126.6, 127.1, 127.8, 127.8, 128.1, 128.6, 128.9, 130.2, 131.1, 131.3, 131.4, 136.5, 136.6, 137.5, 138.6, 155.0, 178.3.  $^{31}\text{P}\{^1\text{H}\}$  NMR ( $\text{CDCl}_3$ )  $\delta$  12.65. HRMS (ESI) calcd for  $\text{C}_{41}\text{H}_{50}\text{BrNPd}_2\text{P}$ : 805.1233 Found: 805.1210.

### Preparation of palladated dihydropentacene **16**

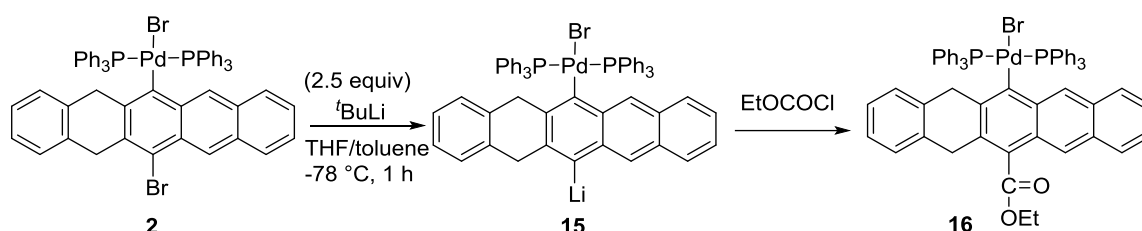

In a 20 mL Schlenk tube, under nitrogen atmosphere, palladated dihydropentacene **2** (25 mg, 0.023 mmol) was dissolved in THF : toluene (1 : 3) (2 mL). To the mixture was added  $t\text{BuLi}$  (0.033 mL, 0.058 mmol) at  $-78\text{ }^\circ\text{C}$ , and it was stirred at  $-78\text{ }^\circ\text{C}$  for 1 h. Then ethyl chloroformate (0.004 mL, 0.046 mmol) was added to the mixture solution at  $-78\text{ }^\circ\text{C}$ . The mixture was warmed to room temperature and stirred for 12 h. The solvent was evaporated, and the resulting solids were purified by a flash chromatography (silica gel, hexane: ethyl acetate: chloroform =5:1:1 as eluent) to afford the title compound **16** (14 mg, 57% isolated yield) as a pale yellow solid.

**16:**  $^1\text{H}$  NMR ( $\text{CDCl}_3$ ,  $\text{Me}_4\text{Si}$ , 400M)  $\delta$  1.51 (t,  $J = 7.2$  Hz, 3 H), 3.32 (s, 2 H), 4.03 (s, 2 H), 4.55 (q,  $J = 7.2$  Hz, 2 H), 6.64 (d,  $J = 7.6$  Hz, 1 H), 6.94-7.08 (m, 16 H), 7.18-7.22 (m, 6 H), 7.29-7.37 (m, 13 H), 7.64 (d,  $J = 6.8$  Hz, 1 H), 7.78 (d,  $J = 6.8$  Hz, 1 H), 7.88 (s, 1 H), 9.39 (s, 1 H).  $^{13}\text{C}$  NMR ( $\text{CDCl}_3$ ,  $\text{Me}_4\text{Si}$ , 400M)  $\delta$  14.5, 35.2, 40.8, 60.7, 122.4, 124.3, 124.8, 125.8, 125.9, 126.6, 126.6, 127.6, 127.7, 127.8, 129.7, 129.8, 130.4, 130.6, 130.9, 131.0, 132.9, 134.3, 135.4, 136.1, 137.1, 164.0, 170.1.  $^{31}\text{P}\{^1\text{H}\}$  NMR ( $\text{CDCl}_3$ )  $\delta$  24.3. HRMS (ESI) calcd for  $\text{C}_{61}\text{H}_{49}\text{BrO}_2\text{P}_2\text{Pd}$ : 1062.1406. Found: 1062.1410.

### Preparation of palladated dihydropentacene **17**

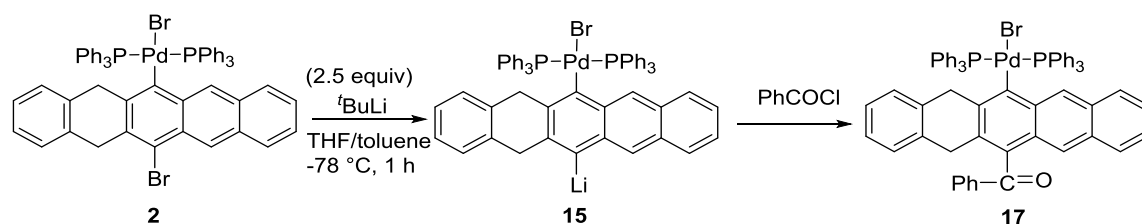

By the same method as described for **16**, the title compound **17** was obtained in 62% isolated yield as a pale yellow solid.

**17**:  $^1\text{H}$  NMR ( $\text{CDCl}_3$ ,  $\text{Me}_4\text{Si}$ , 600M)  $\delta$  3.08 (s, 2 H), 4.15 (s, 2 H), 6.69 (d,  $J = 7.2$  Hz, 1 H), 6.75 (d,  $J = 7.2$  Hz, 1 H), 6.95 (t,  $J = 7.2$  Hz, 1 H), 6.98 (t,  $J = 7.2$  Hz, 1 H), 7.11-7.13 (m, 12 H), 7.23-7.28 (m, 10 H), 7.42-7.46 (m, 12 H), 7.57 (s, 1 H), 7.59-7.60 (m, 2 H), 7.63 (d,  $J = 7.8$  Hz, 1 H), 7.74-7.76 (m, 2 H), 9.49 (s, 1 H).  $^{13}\text{C}$  NMR ( $\text{CDCl}_3$ ,  $\text{Me}_4\text{Si}$ , 600M)  $\delta$  35.1, 41.2, 123.1, 124.3, 124.6, 125.7, 125.8, 126.4, 126.6, 127.8, 128.4, 128.9, 129.7, 130.0, 130.8, 132.7, 133.5, 134.4, 135.7, 135.8, 136.2, 137.5, 138.3, 159.3, 200.2.  $^{31}\text{P}\{^1\text{H}\}$  NMR ( $\text{CDCl}_3$ )  $\delta$  24.6. HRMS (FAB) calcd for  $\text{C}_{65}\text{H}_{49}\text{BrOP}_2\text{Pd}$ : 1094.1487. Found: 1094.1504.

### Preparation of palladated dihydropentacene **18**

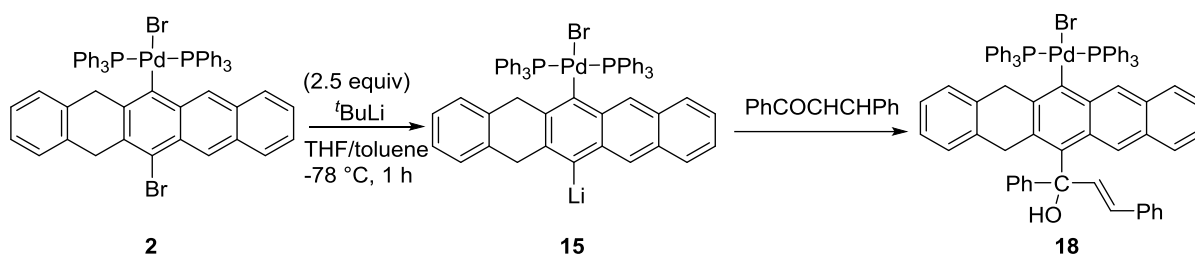

In a 20 mL Schlenk tube, under nitrogen atmosphere, palladated dihydropentacene **2** (62 mg, 0.058 mmol) was dissolved in THF (4 mL). To the mixture was added  $t\text{-BuLi}$  (0.082 mL, 0.145 mmol) at  $-78^\circ\text{C}$ , and it was stirred for 1 h. Reagent (E)-chalcone (14 mg, 0.07 mmol) was added to the mixture solution at  $-78^\circ\text{C}$ . The mixture was warmed to room temperature and stirred for 12 h. The reaction mixture was quenched with methanol. The solvent was evaporated, and the resulting solids were purified by a flash chromatography (silica gel, hexane: ethyl acetate: chloroform = 3:1:1 as eluent) to afford the title compound **18** (46 mg, 66% isolated yield) as a yellow solid.

**18**:  $^1\text{H}$  NMR ( $\text{CDCl}_3$ ,  $\text{Me}_4\text{Si}$ , 600M)  $\delta$  2.27 (s, 1 H), 3.35 (d,  $J = 15.6$  Hz, 1 H), 3.62 (d,  $J = 15.6$  Hz, 1 H), 4.13 (d,  $J = 15.6$  Hz, 1 H), 4.42 (d,  $J = 15.6$  Hz, 1 H), 6.03 (d,  $J = 15.6$  Hz, 1 H), 6.48 (d,  $J = 7.2$  Hz, 1 H), 6.60 (d,  $J = 7.8$  Hz, 1 H), 6.70 (d,  $J = 15.6$  Hz, 1 H), 6.85 (t,  $J = 7.2$  Hz, 1 H), 6.91 (t,  $J = 7.8$  Hz, 1 H), 7.06-7.11 (m, 12 H), 7.18-7.52 (m, 31 H), 7.68 (d,  $J = 8.4$  Hz, 1 H), 8.41 (s, 1 H), 9.58 (s, 1 H).  $^{31}\text{P}\{^1\text{H}\}$  NMR ( $\text{CDCl}_3$ )  $\delta$  24.3. HRMS (FAB) calcd for  $\text{C}_{73}\text{H}_{57}\text{BrOP}_2\text{Pd}$ : 1198.2116. Found: 1198.2139.

### Preparation of palladated dihydropentacene **19**

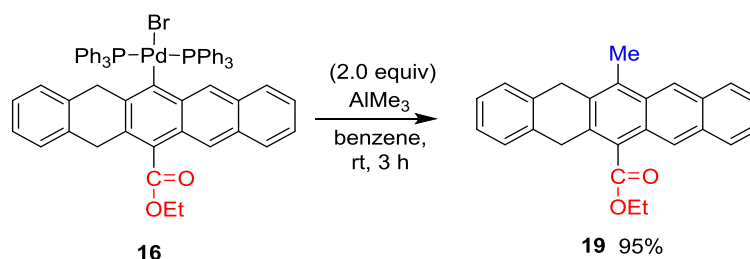

In a 20 mL Schlenk tube, palladated dihydropentacene **16** (30 mg, 0.0282 mmol) was dissolved in benzene (2 mL). To the mixture was added AlMe<sub>3</sub> (0.052 mL, 0.056 mmol) at room temperature, and it was stirred for 3 h at room temperature. The solvent was evaporated, and the resulting solids were purified by a flash chromatography (silica gel, hexane: ethyl acetate = 5:1 as eluent) to afford the title compound **19** (9.9 mg, 95% isolated yield).

**19**: <sup>1</sup>H NMR (CDCl<sub>3</sub>, Me<sub>4</sub>Si, 600M)  $\delta$  1.56 (t,  $J$  = 7.2 Hz, 3 H), 2.91 (s, 3 H), 4.11 (s, 2 H), 4.20 (s, 2 H), 4.68 (q,  $J$  = 7.2 Hz, 2 H), 7.23-7.25 (m, 2 H), 7.33 (t,  $J$  = 4.2 Hz, 1 H), 7.38 (t,  $J$  = 4.2 Hz, 1 H), 7.45-7.47 (m, 2 H), 7.96-7.97 (m, 1 H), 8.01-8.03 (m, 1 H), 8.34 (s, 1 H), 8.62 (s, 1 H). <sup>13</sup>C NMR (CDCl<sub>3</sub>, Me<sub>4</sub>Si, 600M)  $\delta$  14.5, 15.3, 33.9, 35.1, 61.5, 123.1, 123.6, 125.5, 125.6, 126.5, 126.6, 126.9, 127.2, 127.2, 127.3, 128.1, 128.4, 130.0, 131.4, 131.4, 132.0, 133.0, 136.1, 136.6, 170.1. HRMS (EI) calcd for C<sub>26</sub>H<sub>22</sub>O<sub>2</sub>: 366.1620. Found: 366.1614.

### Preparation of palladated pentacene **20**

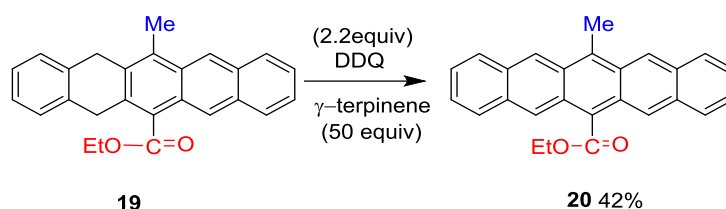

In a 20 mL Schlenk tube, palladated dihydropentacene **19** (9.9 mg, 0.027 mmol) and 2,3-dichloro-5,6-dicyanobenzoquinone (13.5 mg, 0.059 mmol) were dissolved in benzene (2 mL). Under nitrogen atmosphere, the mixture was stirred for 2 h at 50 °C. The pentacene-DDQ adduct was formed firstly, without isolation of pentacene-DDQ adduct,  $\gamma$ -terpinene (0.22 mL, 1.35 mmol) was added to the reaction solution. The mixture was degassed by three times of freeze-pump thaw cycle and heated at 80 °C for about 6 h. After cooling to room temperature, the solvent was removed in vacuo. The resulting solids were purified by a flash chromatography (silica gel, CHCl<sub>3</sub> as eluent) under nitrogen to afford the title compound **20** (4.1mg, 42% isolated yield) as a blue solid.

**20**: <sup>1</sup>H NMR (CDCl<sub>3</sub>, Me<sub>4</sub>Si, 400M)  $\delta$  1.64 (t,  $J$  = 7.2 Hz, 3 H), 3.48 (s, 3 H), 4.85 (q,  $J$  = 7.2 Hz, 2 H), 7.26-7.39 (m, 4 H), 7.90-7.92 (m, 2 H), 7.96-7.98 (m, 2 H), 8.66 (s, 2 H), 8.96 (s, 2 H). <sup>13</sup>C NMR (CDCl<sub>3</sub>, Me<sub>4</sub>Si, 400M)  $\delta$  14.6, 15.4, 61.9, 123.8, 123.9, 125.5, 125.9, 126.3, 127.8, 128.3, 128.7, 131.1, 131.8, 133.8, 170.7. HRMS (EI) calcd for C<sub>26</sub>H<sub>20</sub>O<sub>2</sub>: 364.1463. Found: 364.1468

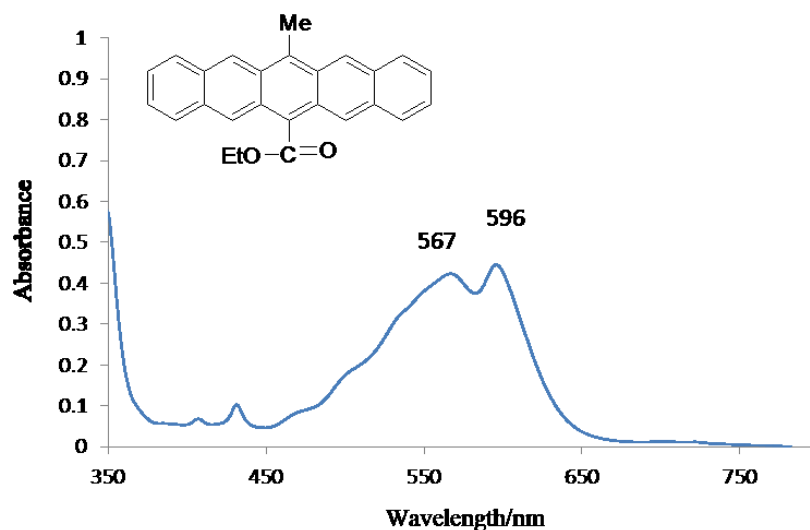

Figure S1. Absorption spectrum of pentacene derivative **20** in CH<sub>2</sub>Cl<sub>2</sub> at rt.

#### Preparation of palladated dihydropentacene **21**

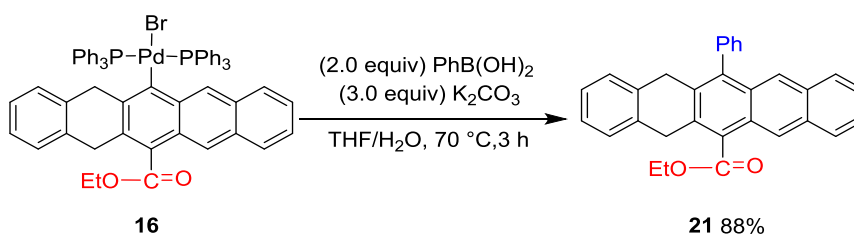

In a 20 mL Schlenk tube, palladated dihydropentacene **16** (43 mg, 0.04 mmol), phenylboronic acid (10 mg, 0.08 mmol) and potassium carbonate (17 mg, 0.12 mmol) were dissolved in mixed solution of THF and H<sub>2</sub>O (10:1) (2 mL). The solution was degassed by three times of freeze-pump-thaw cycles and heated at 70 °C for 3 h. The solvent was evaporated, and the resulting solids were purified by column chromatography (silica gel, hexane: ethyl acetate = 5:1 as eluent) to afford the title compound **21** (15 mg, 88% isolated yield) as solid.

**21**: <sup>1</sup>H NMR (CDCl<sub>3</sub>, Me<sub>4</sub>Si, 600M)  $\delta$  1.59 (t,  $J$  = 7.6 Hz, 3 H), 3.81 (s, 2 H), 4.17 (s, 2 H), 4.73 (q,  $J$  = 7.6 Hz, 2 H), 7.11-7.24 (m, 3 H), 7.33-7.45 (m, 5 H), 7.56-7.64 (m, 3 H), 7.78 (d,  $J$  = 8.4 Hz, 1 H), 7.94 (s, 2 H), 7.97 (d,  $J$  = 8.4 Hz, 1 H), 8.42 (s, 1 H). <sup>13</sup>C NMR (CDCl<sub>3</sub>, Me<sub>4</sub>Si, 400M)  $\delta$  14.6, 34.9, 35.2, 61.6, 123.1, 125.4, 125.7, 125.8, 126.5, 126.8, 127.1, 127.2, 127.7, 128.1, 128.4, 128.7, 130.2, 131.3, 131.5, 132.5, 133.3, 136.1, 136.9, 138.2, 139.0, 169.9. HRMS (EI) calcd for C<sub>31</sub>H<sub>24</sub>O<sub>2</sub>: 428.1776. Found: 428.1773.

#### Preparation of palladated pentacene **22**

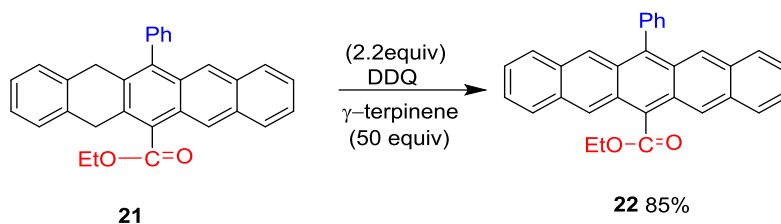

By the same aromatic method as described for pentacene **20**, the title compound **22** was obtained in 85% isolated yield as a blue solid.

**22**:  $^1\text{H}$  NMR ( $\text{CDCl}_3$ ,  $\text{Me}_4\text{Si}$ , 400M)  $\delta$  1.67 (t,  $J = 7.2$  Hz, 3 H), 4.89 (q,  $J = 7.2$  Hz, 2 H), 7.25-7.29 (m, 2 H), 7.33-7.37 (m, 2 H), 7.55-7.57 (m, 2 H), 7.68-7.74 (m, 5 H), 7.92 (d,  $J = 8.8$  Hz, 2 H), 8.29 (s, 2 H), 8.70 (s, 2 H).  $^{13}\text{C}$  NMR ( $\text{CDCl}_3$ ,  $\text{Me}_4\text{Si}$ , 600M)  $\delta$  14.6, 62.1, 123.3, 125.4, 126.1, 126.2, 126.3, 127.5, 128.0, 128.2, 128.3, 128.6, 128.7, 131.1, 131.4, 132.0, 138.9, 140.1, 170.5. HRMS (EI) calcd for  $\text{C}_{31}\text{H}_{22}\text{O}_2$ : 426.1620. Found: 426.1625.

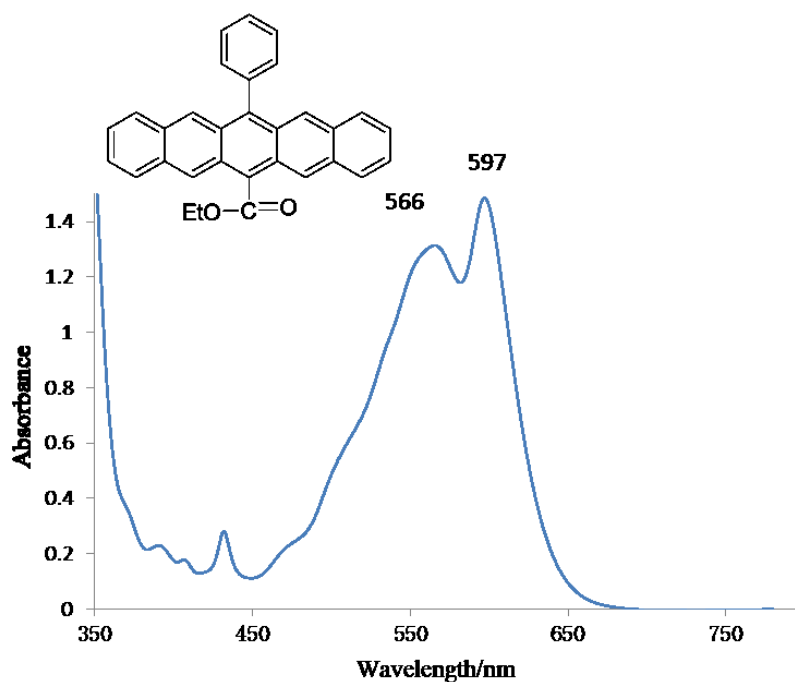

**Figure S2.** Absorption spectrum of pentacene derivative **22** in  $\text{CHCl}_3$  at rt.

### Preparation of palladated dihydropentacene **23**

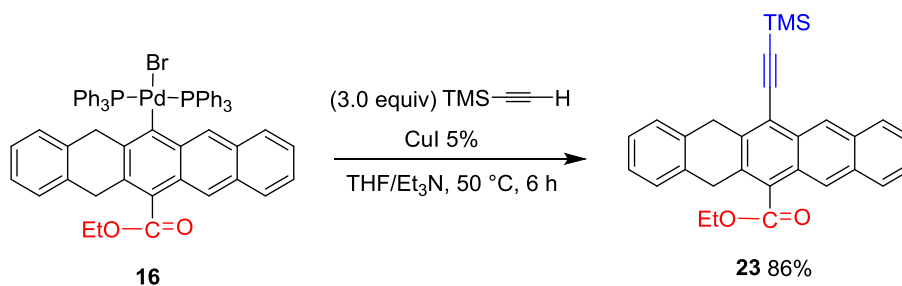

In a 20 mL Schlenk tube, palladated dihydropentacene **16** (13.7 mg, 0.0129 mmol) and CuI (3 mg, 0.016 mmol) were dissolved in mixed solution of THF : Et<sub>3</sub>N (1 : 1) (2 mL). The mixture was degassed by three times of freeze-pump thaw cycle. To the mixture was added trimethylsilylacetylene (0.005 mL, 0.039 mmol) at room temperature, and it was stirred for 6 h at 50 °C. The solvent was evaporated, and the resulting solids were purified by a flash chromatography (silica gel, hexane: ethyl acetate = 5:1 as eluent) to afford the title compound **23** (5 mg, 86% isolated yield) as a solid.

**23**: <sup>1</sup>H NMR (CDCl<sub>3</sub>, Me<sub>4</sub>Si, 600M)  $\delta$  0.47 (s, 9 H), 1.57 (t,  $J$  = 7.2 Hz, 3 H), 4.11 (s, 2 H), 4.41 (s, 2 H), 4.69 (q,  $J$  = 7.2 Hz, 2 H), 7.23-7.28 (m, 2 H), 7.33 (d,  $J$  = 7.2 Hz, 1 H), 7.40 (d,  $J$  = 7.2 Hz, 1 H), 7.47-7.51 (m, 2 H), 7.98 (d,  $J$  = 8.4 Hz, 1 H), 8.05 (d,  $J$  = 8.4 Hz, 1 H), 8.38 (s, 1 H), 8.92 (s, 1 H). <sup>13</sup>C NMR (CDCl<sub>3</sub>, Me<sub>4</sub>Si, 400M)  $\delta$  0.2, 14.5, 34.7, 35.7, 61.7, 101.4, 106.4, 119.5, 123.7, 125.4, 125.9, 126.4, 126.6, 126.7, 127.3, 127.5, 128.3, 128.4, 129.0, 129.7, 131.8, 131.9, 132.8, 135.6, 136.0, 138.8, 169.4. HRMS (EI) calcd for C<sub>30</sub>H<sub>28</sub>O<sub>2</sub>Si: 448.1859. Found: 448.1862.

### Preparation of palladated pentacene **24**

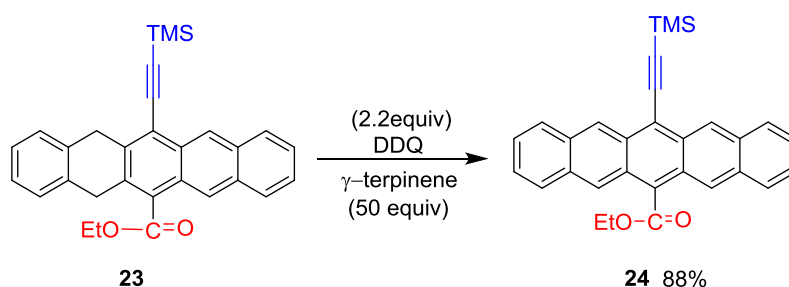

In a 20 mL Schlenk tube, palladated dihydropentacene **23** (6.2 mg, 0.0138 mmol) and 2,3-dichloro-5,6-dicyanobenzoquinone (7 mg, 0.0304 mmol) were dissolved in benzene (2 mL). Under nitrogen atmosphere, the mixture was stirred for 1 h at room temperature. The pentacene-DDQ adduct was formed firstly. Without isolation of pentacene-DDQ adduct,  $\gamma$ -terpinene (0.11 mL, 0.69 mmol) was added to the reaction solution. The mixture was degassed by three times of freeze-pump thaw cycle and heated at 80 °C for about 1 h. After cooling to room temperature, the solvent was removed in vacuo. The resulting solids were purified by a flash chromatography (silica gel, CHCl<sub>3</sub> as eluent) under nitrogen to afford the title compound **24** (4.7 mg, 88% isolated yield) as a blue solid.

**24**: <sup>1</sup>H NMR (CDCl<sub>3</sub>, Me<sub>4</sub>Si, 600M)  $\delta$  0.55 (s, 9 H), 1.64 (t,  $J$  = 7.2Hz, 3 H), 4.86 (t,  $J$  = 7.2Hz, 2 H), 7.38-7.42 (m, 4 H), 7.93-7.94 (m, 2 H), 8.01-8.03 (m, 2 H), 8.65 (s, 2 H), 9.24 (s, 2 H). <sup>13</sup>C NMR (CDCl<sub>3</sub>, Me<sub>4</sub>Si, 600M)  $\delta$  0.3, 14.6, 62.2, 102.4, 110.4, 119.7, 124.1, 126.0, 126.1, 126.1, 126.2, 128.5, 128.7, 130.2, 132.0, 132.3, 169.9. HRMS (EI) calcd for C<sub>30</sub>H<sub>26</sub>O<sub>2</sub>Si: 446.1702. Found: 446.1697.

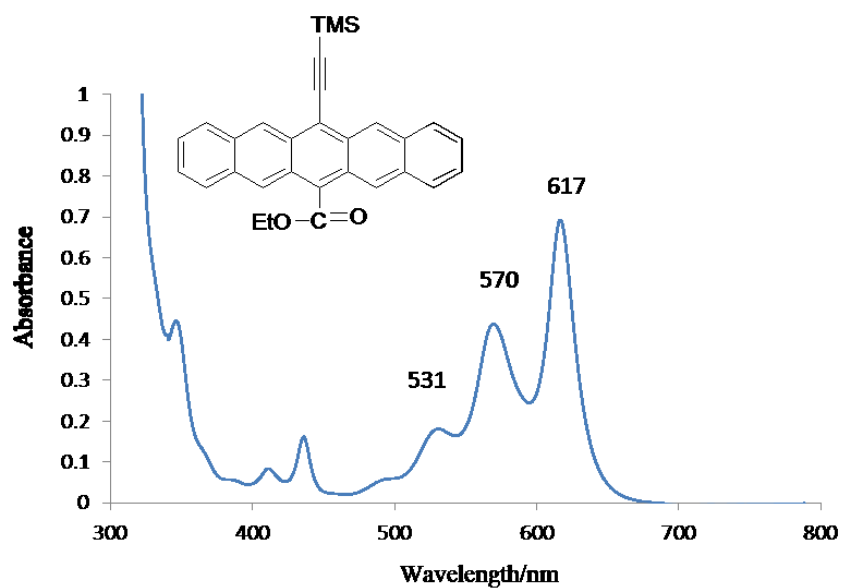

Figure S3. Absorption spectrum of pentacene derivative **24** in  $\text{CHCl}_3$  at rt.

## References

1. a) Z. Jia, S. Li, K. Nakajima, K. Kanno and T. Takahashi, *J. Org. Chem.* 2011, **76**, 293-296.  
b) Z. Jia, S. Li, K. Nakajima, K. Kanno, Z. Song and T. Takahashi, *Heterocycles* 2012, **86**, 1495-1506.
2. D. R. Coulson, L. C. Satek and S. O. Grim, *Inorg. Synth.* 1972, **13**, 121.

## X-ray analysis data for compound 2

**Table 1.** Crystallographic data and experimental details

|                                                              |                                                                   |
|--------------------------------------------------------------|-------------------------------------------------------------------|
| Compound                                                     | <b>2</b>                                                          |
| Formula                                                      | C <sub>58</sub> H <sub>44</sub> Br <sub>2</sub> P <sub>2</sub> Pd |
| M                                                            | 1069.09                                                           |
| Crystal system                                               | monoclinic                                                        |
| Space group                                                  | P 1 21/c 1                                                        |
| <i>a</i> , (Å)                                               | 11.581(3)                                                         |
| <i>b</i> , (Å)                                               | 18.509(4)                                                         |
| <i>c</i> , (Å)                                               | 22.700(5)                                                         |
| $\alpha$ , (°)                                               | 90.00                                                             |
| $\beta$ , (°)                                                | 100.345(11)                                                       |
| $\gamma$ , (°)                                               | 90.00                                                             |
| <i>V</i> , (Å <sup>3</sup> )                                 | 4787(2)                                                           |
| <i>Z</i>                                                     | 4                                                                 |
| Temperature T, (K)                                           | 298                                                               |
| Crystal habit                                                | prism                                                             |
| Crystal color                                                | Green                                                             |
| Crystal size, (mm <sup>3</sup> )                             | 0.60 x 0.30 x 0.10                                                |
| D <sub>calcd</sub> , (g cm <sup>-3</sup> )                   | 1.483                                                             |
| Transm factor                                                | 0.3570-0.8128                                                     |
| $\lambda$ (Mo K $\alpha$ ), (Å)                              | 0.71075                                                           |
| Diffractometer                                               | Rigaku R-Axis RAPID                                               |
| Scan mode                                                    | $\omega$                                                          |
| Reflections measd                                            | -15 ≤ <i>h</i> ≤ 15<br>-24 ≤ <i>k</i> ≤ 24<br>-29 ≤ <i>l</i> ≤ 29 |
| No. of reflection measd                                      | 10898                                                             |
| No. of reflection obsd [ <i>I</i> > 2 $\sigma$ ( <i>I</i> )] | 8373                                                              |
| No. of parameters refined                                    | 744                                                               |
| <i>R</i>                                                     | 0.0495                                                            |
| <i>R</i> <sub><math>\omega</math></sub>                      | 0.1342                                                            |
| <i>S</i> , goodness of fit                                   | 1.020                                                             |
| Largest diff peak, (e Å <sup>-3</sup> )                      | 1.393                                                             |
| Largest diff hole, (e Å <sup>-3</sup> )                      | -0.982                                                            |

$$R = \sum ||F_o| - |F_c|| / \sum |F_o|,$$

$$R_{\omega} = [\sum \omega(|F_o| - |F_c|)^2 / \sum \omega |F_o|^2]^{1/2}, \quad \omega = [\sigma^2(F_o) + 0.00063(F_o)^2]^{-1}.$$

$$S = [\sum \omega(|F_o| - |F_c|)^2 / (m - n)]^{1/2}, \quad (m = \text{no. of used reflections}, n = \text{no. of refined parameters})$$



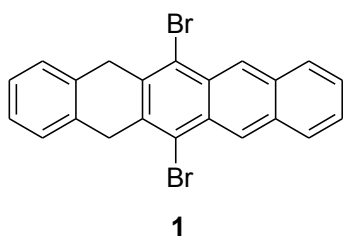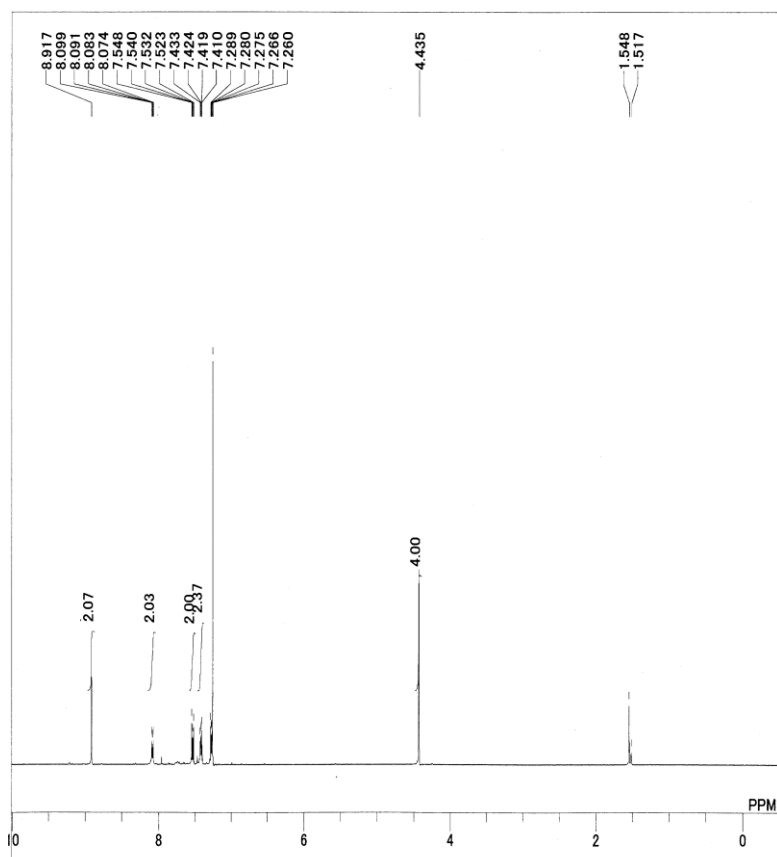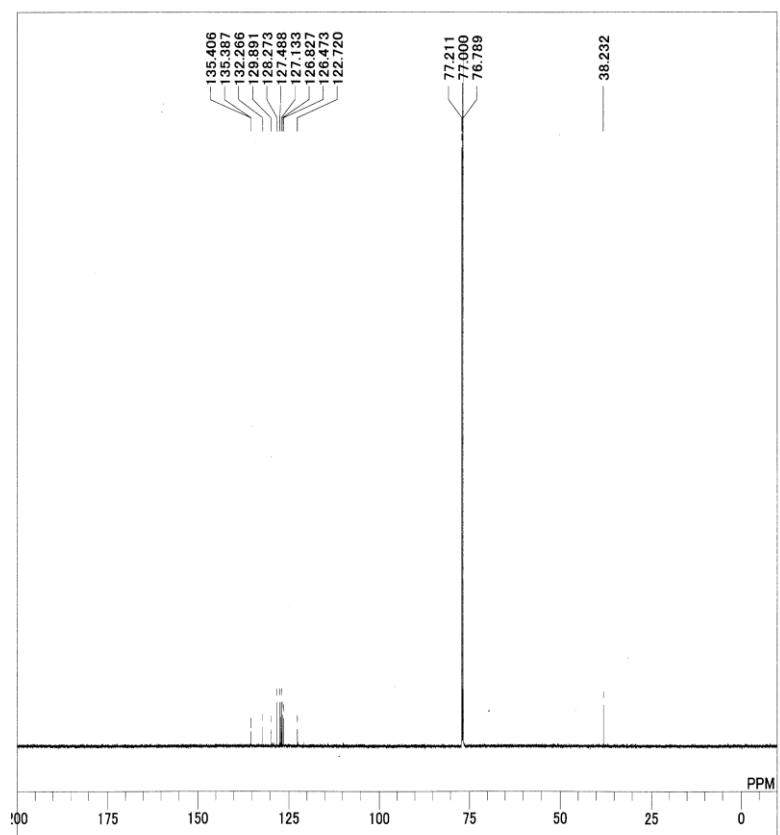

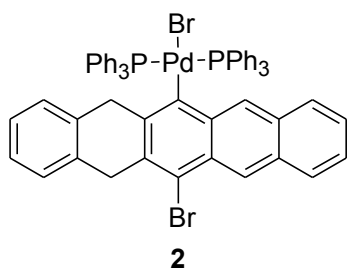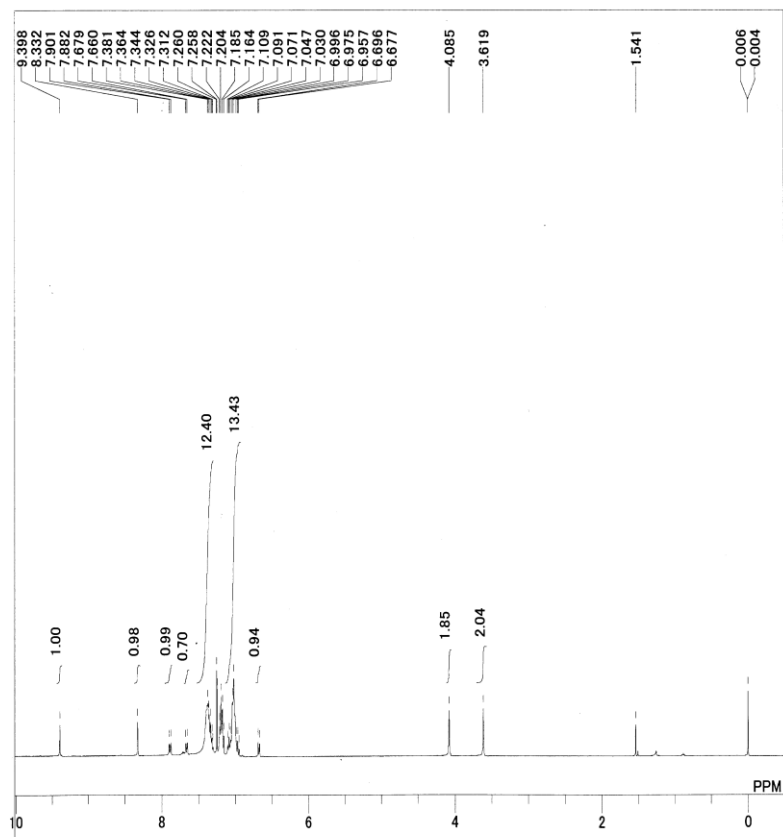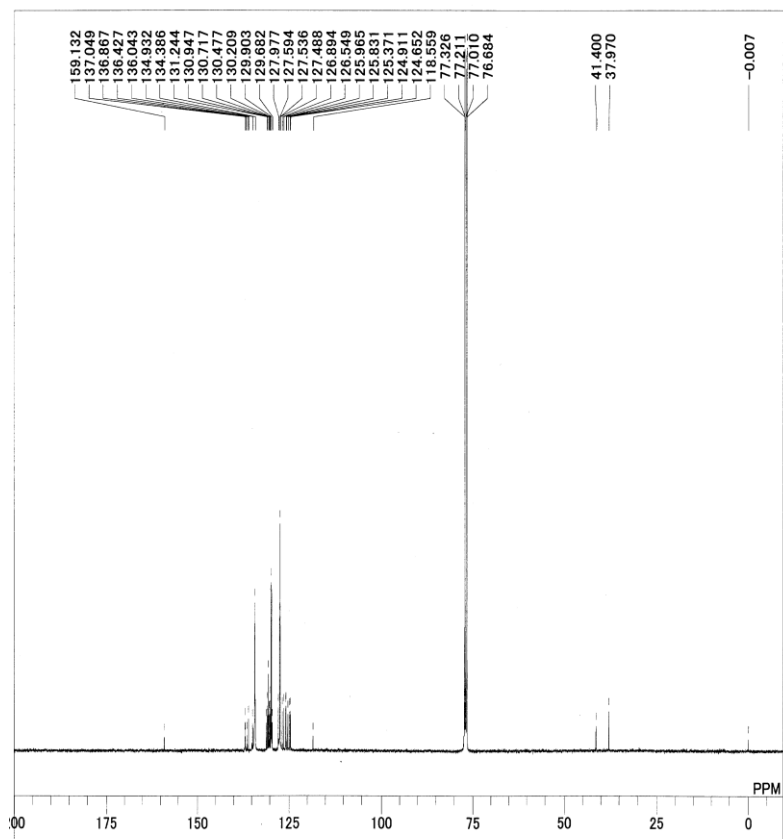

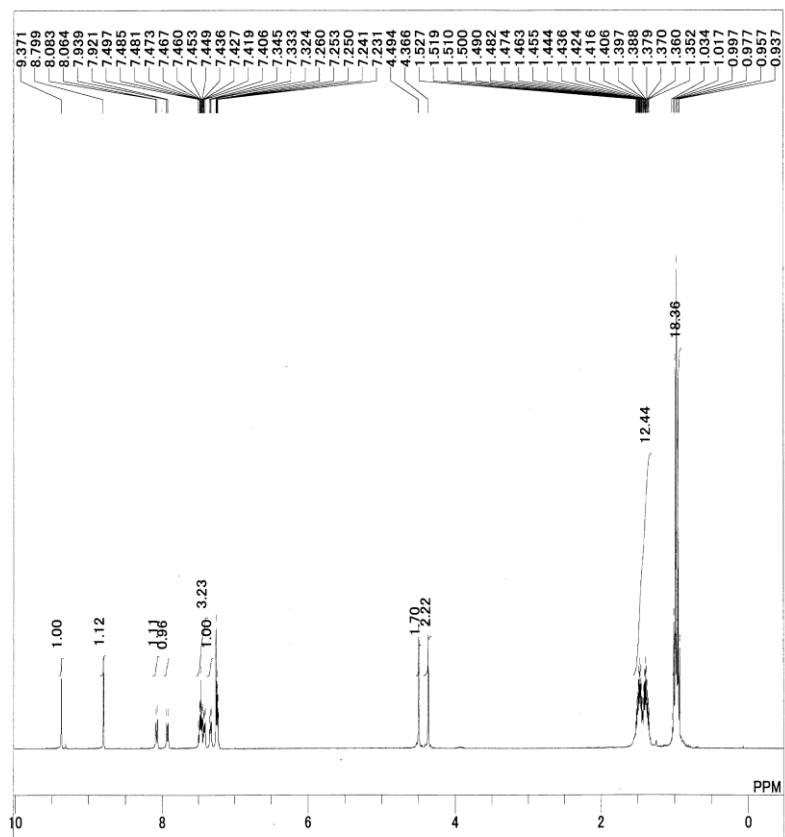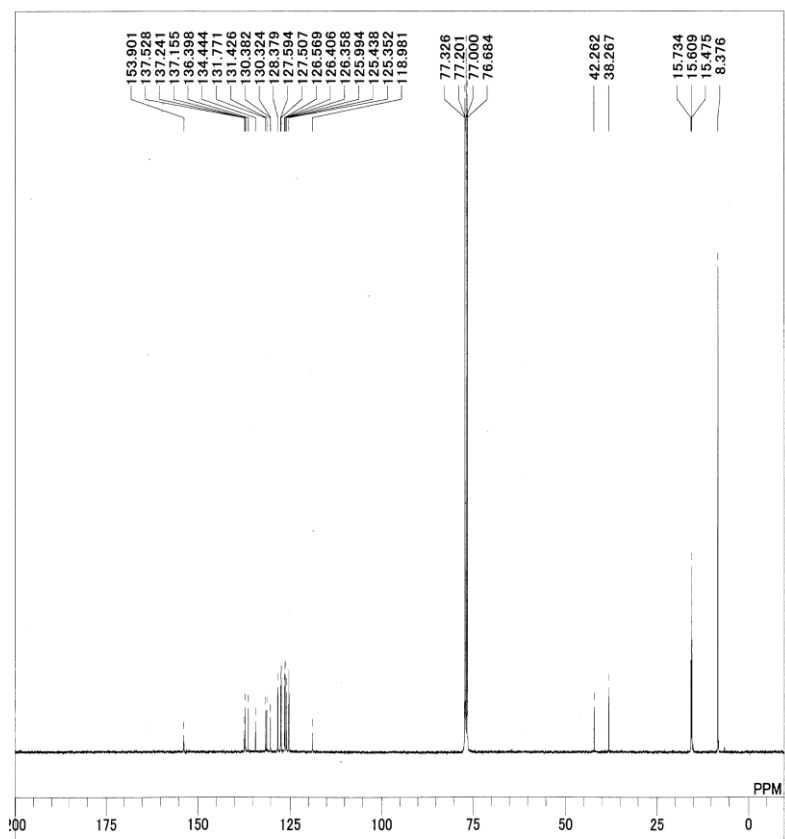

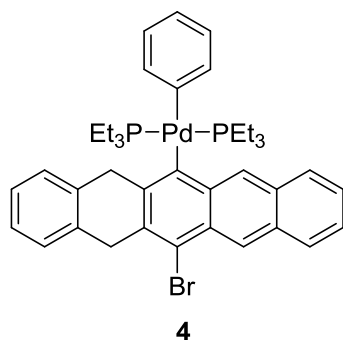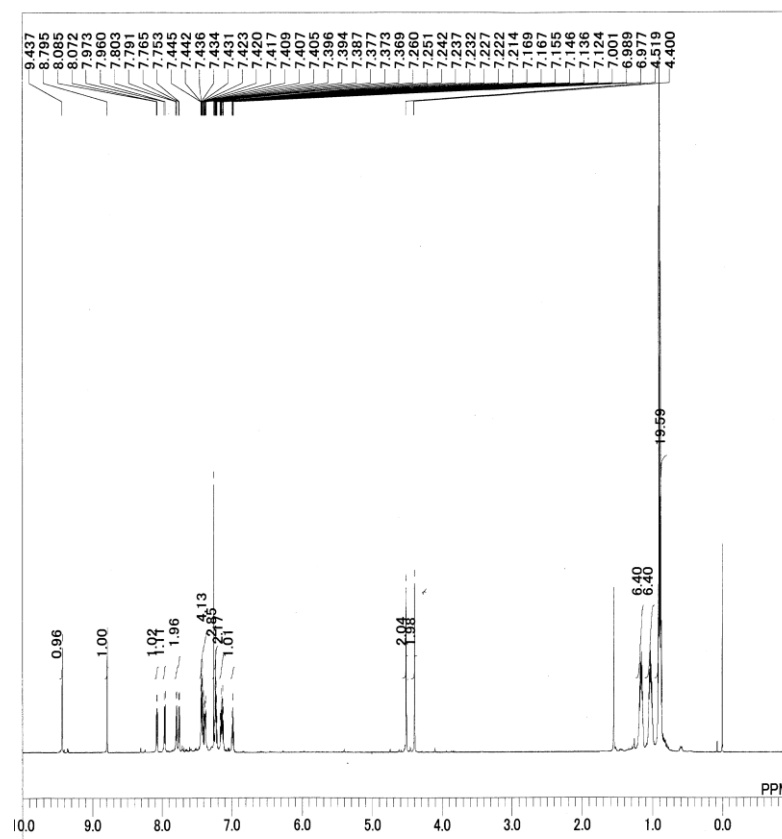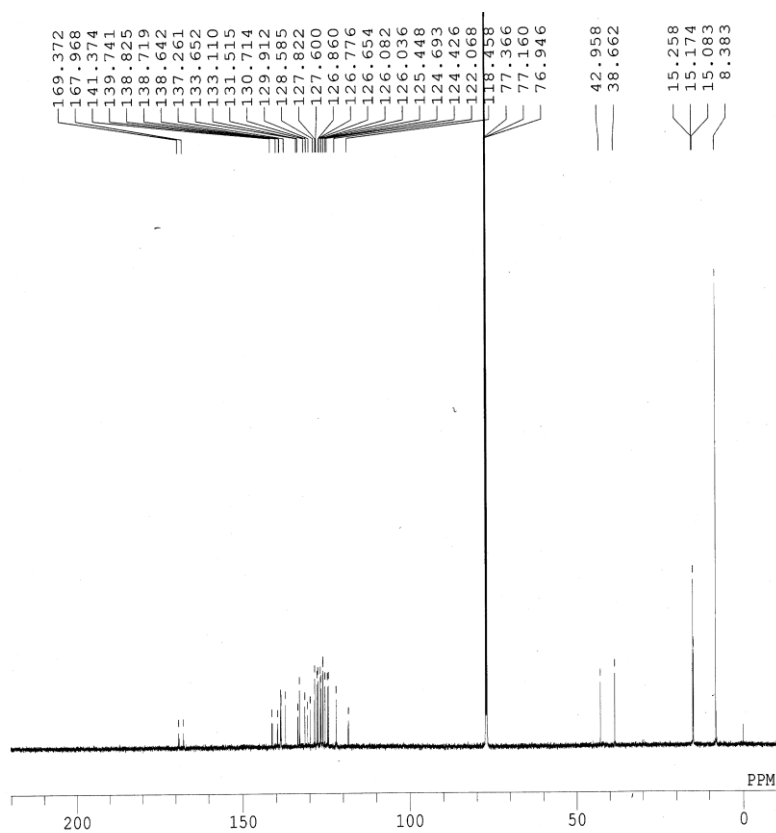

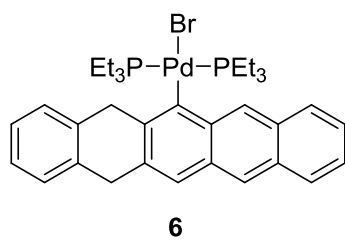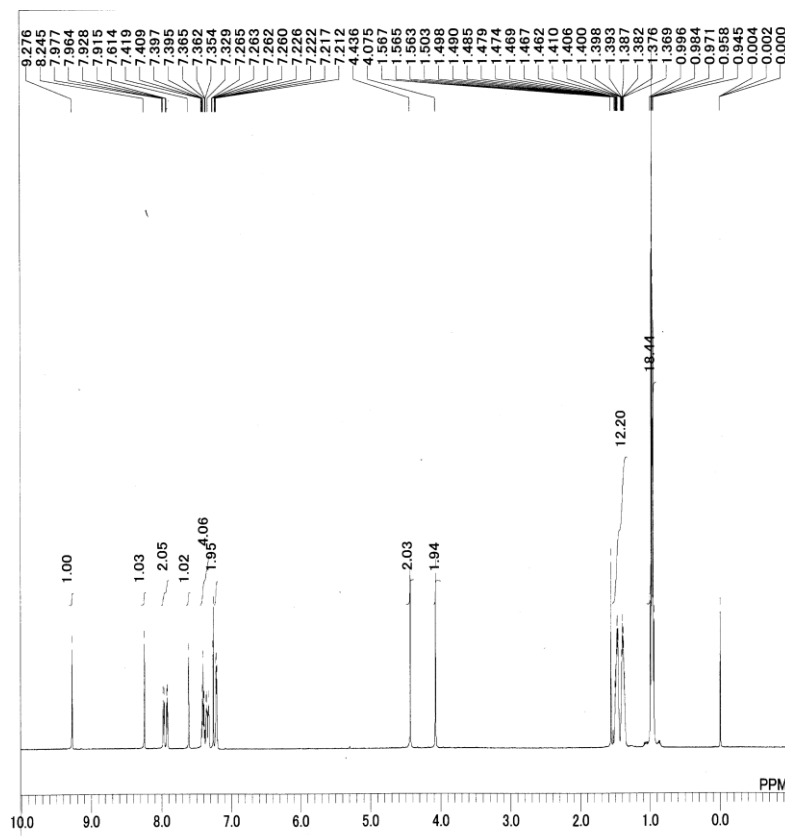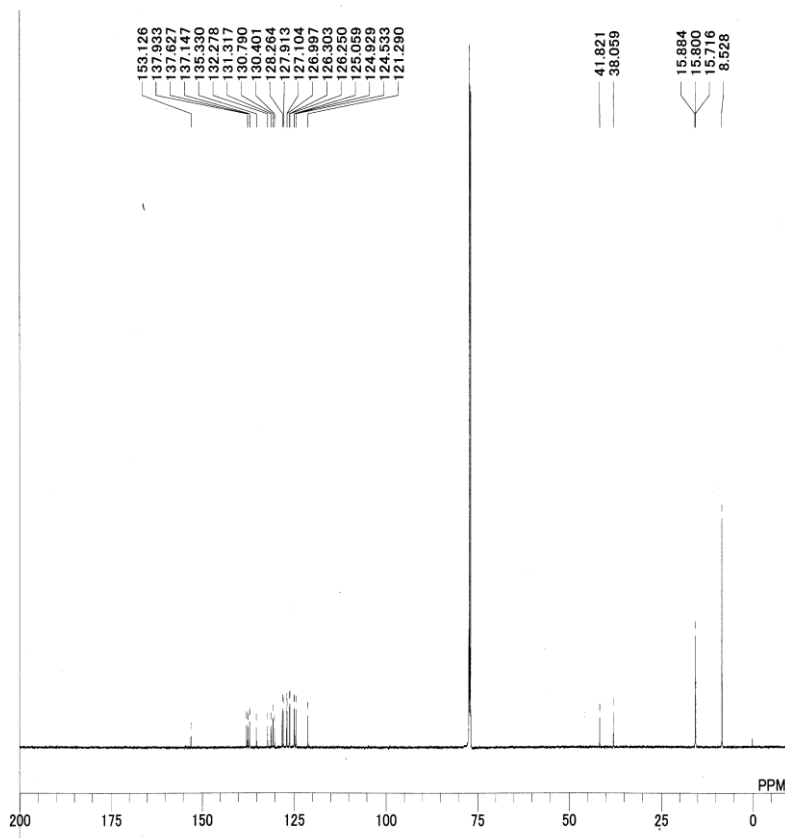

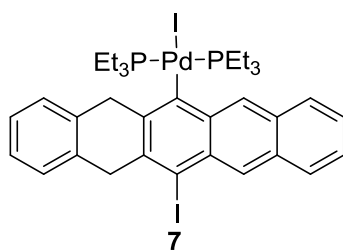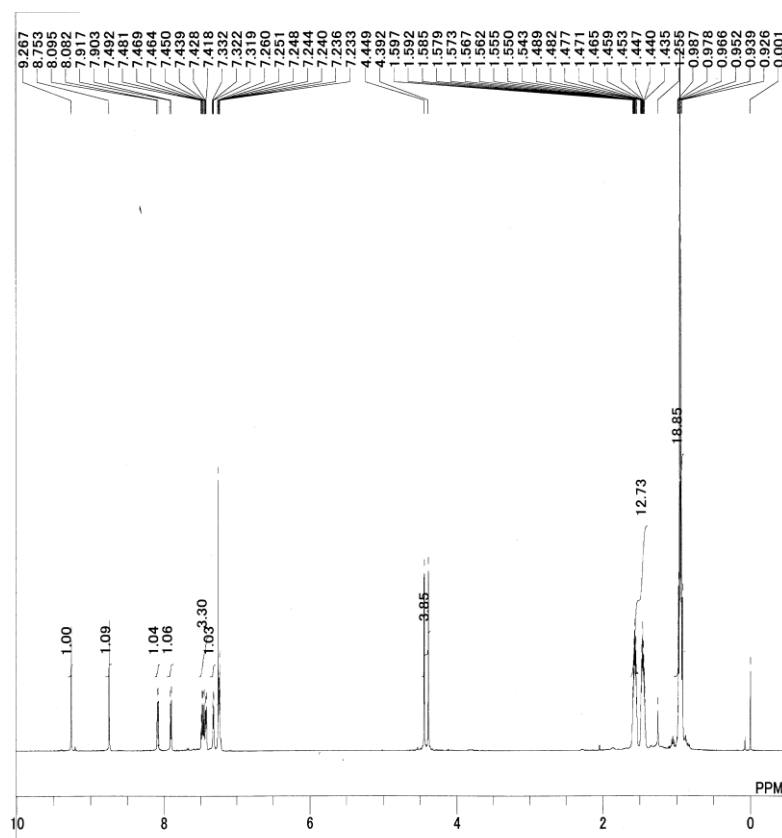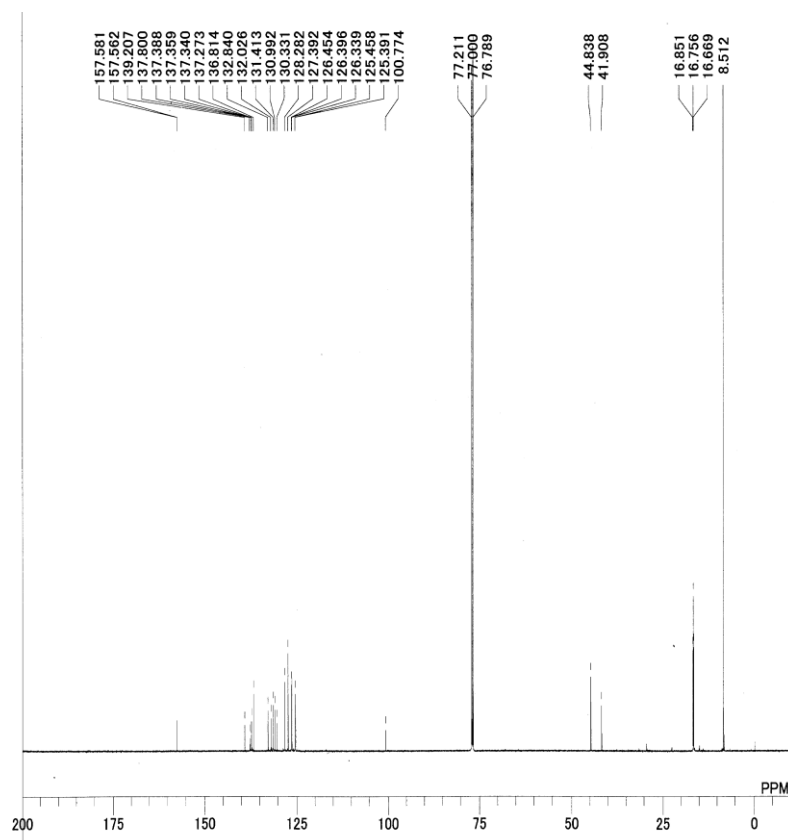

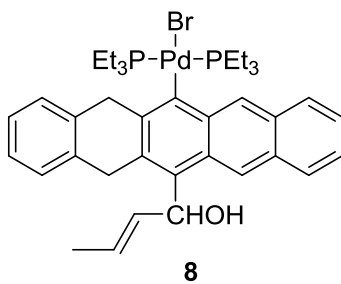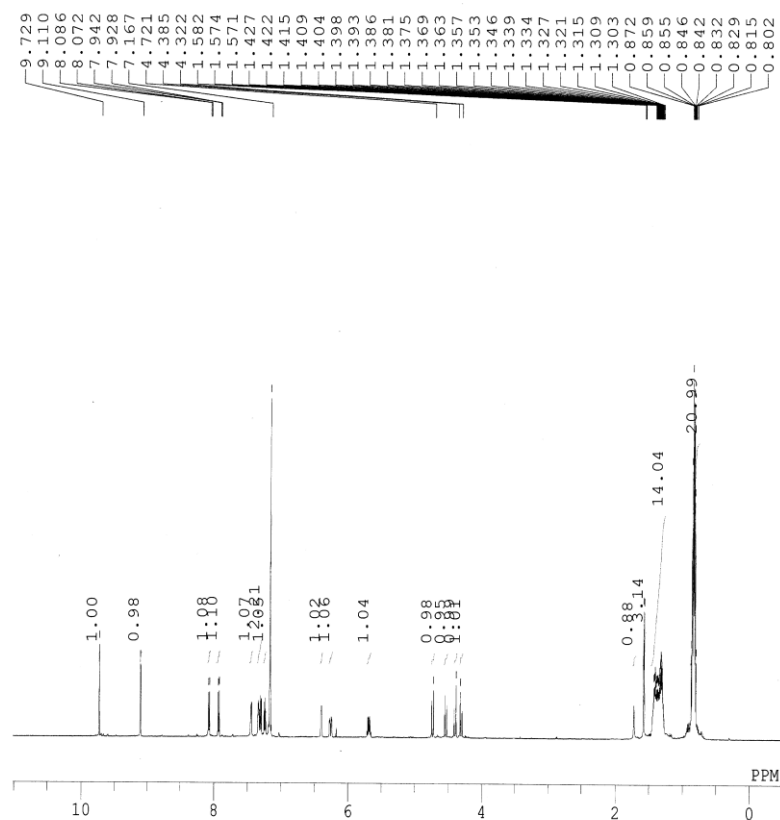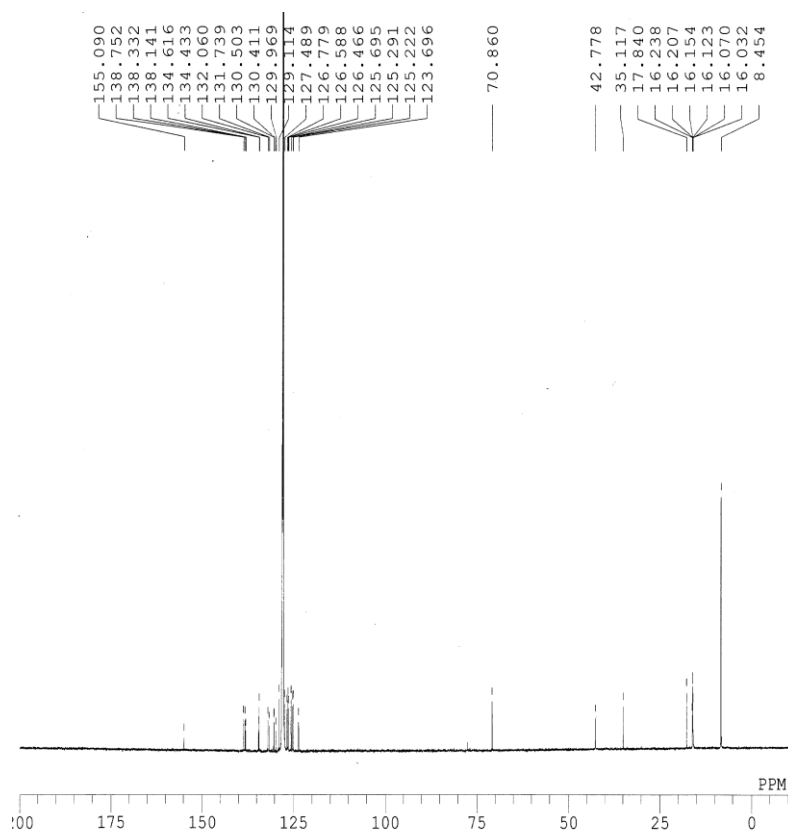

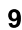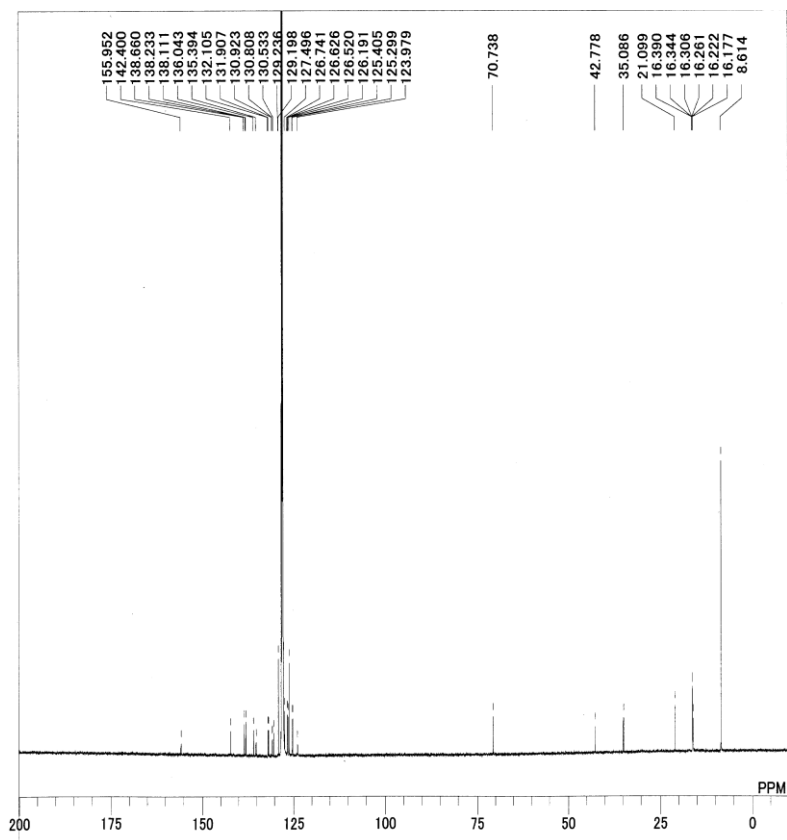



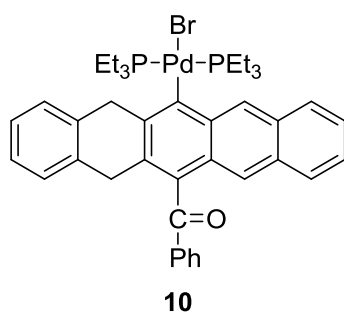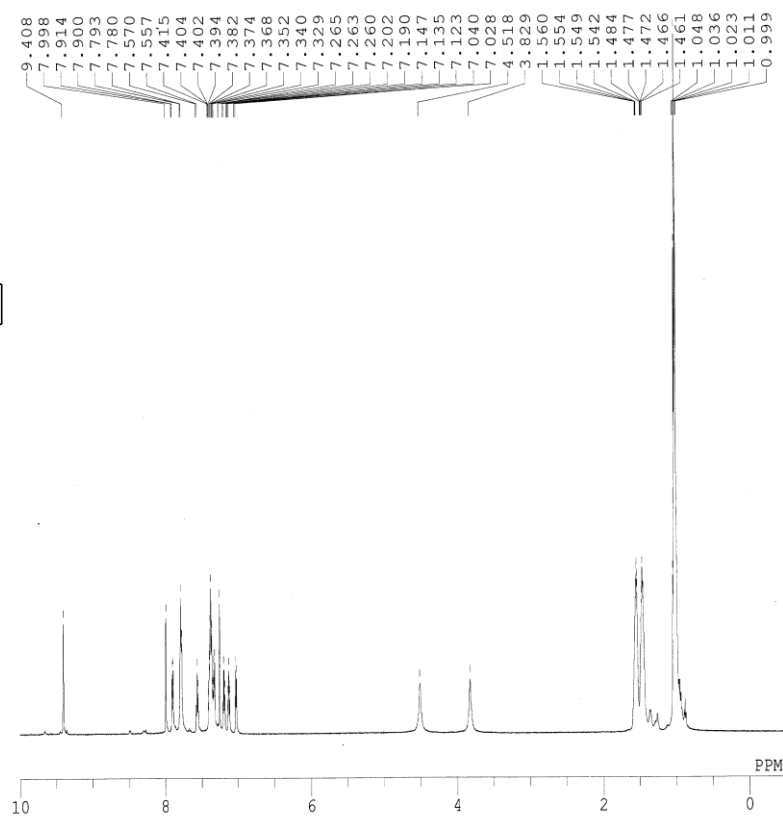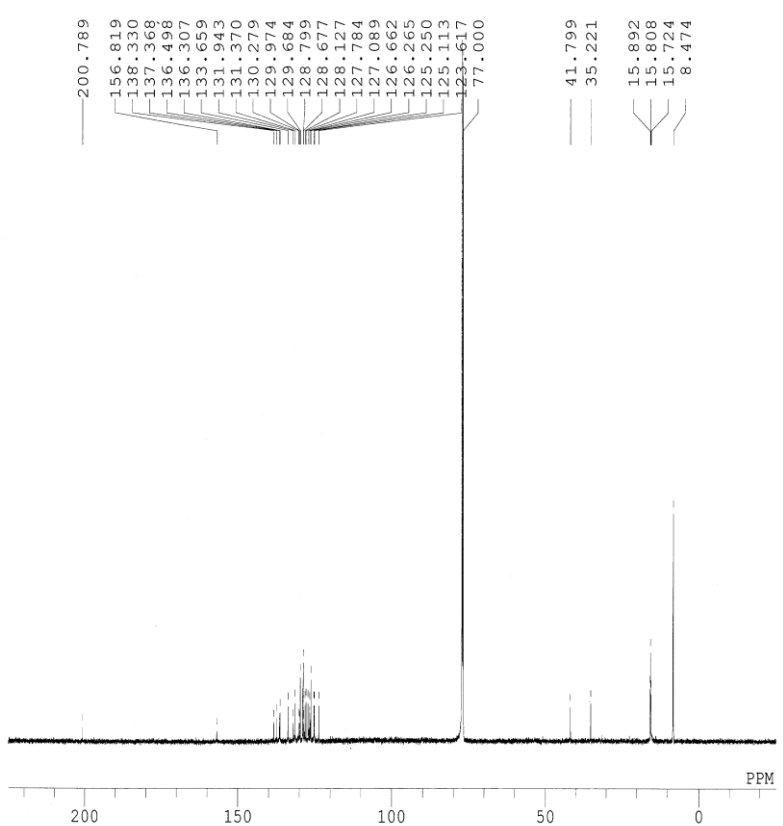

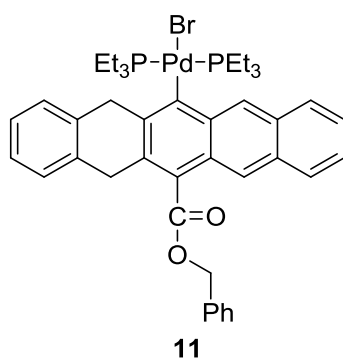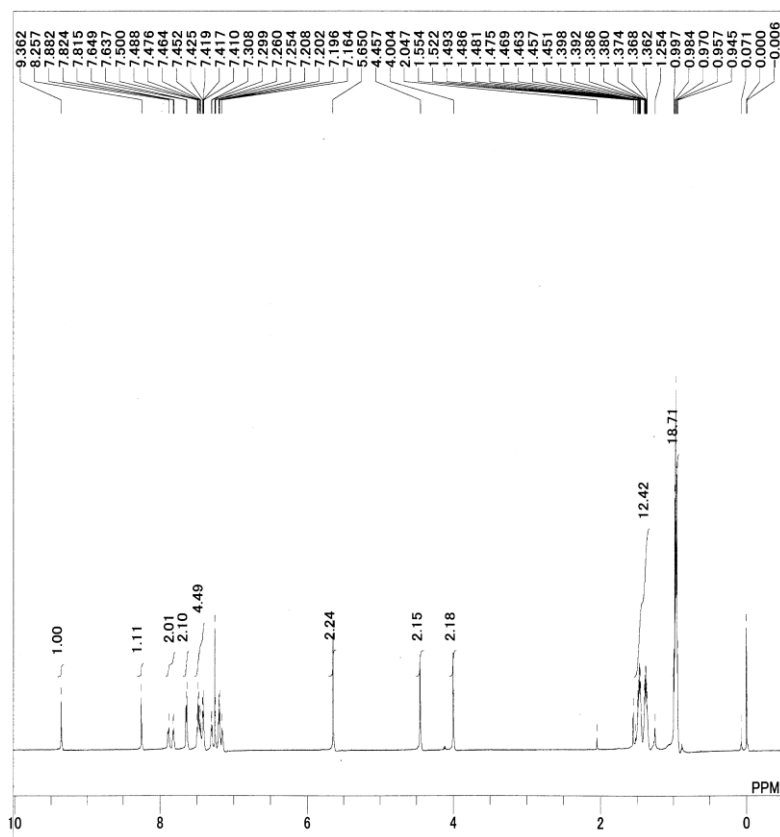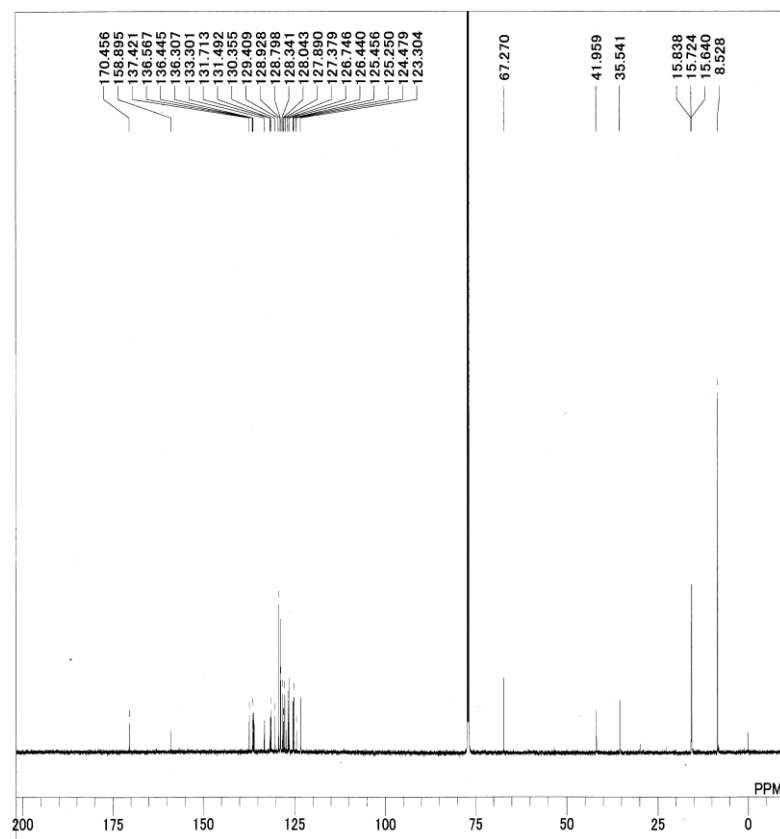

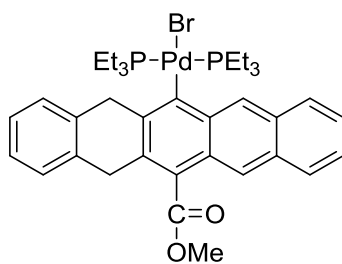

**12**

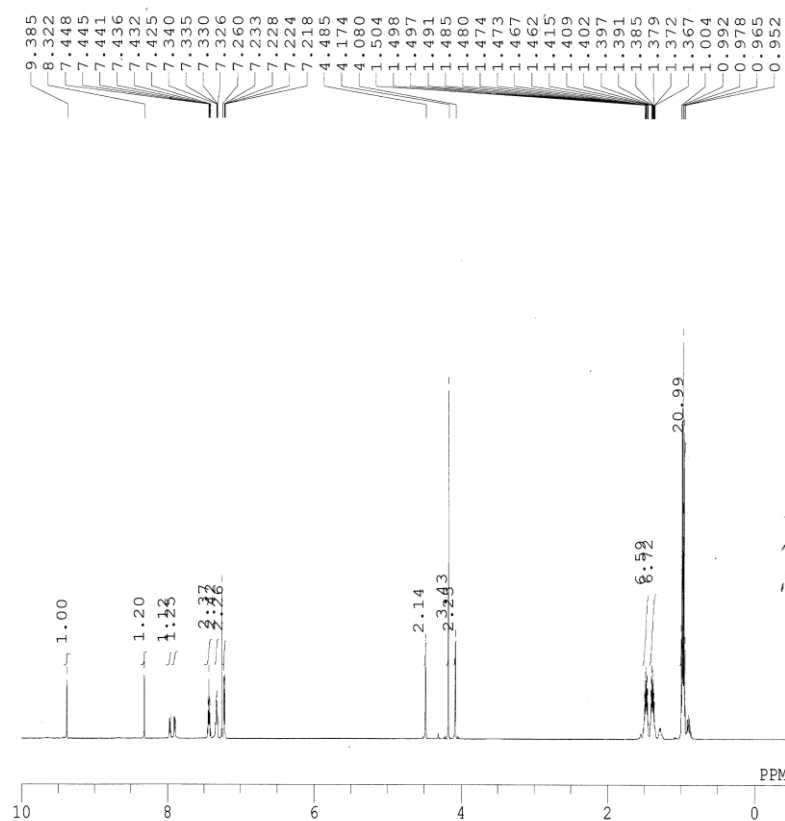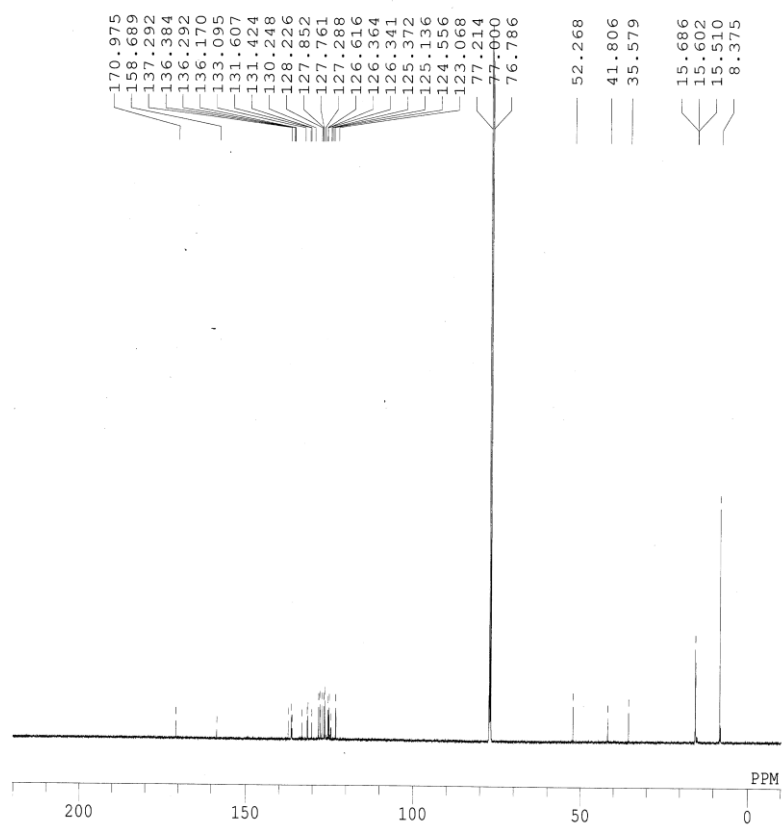

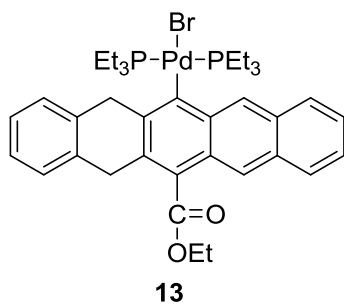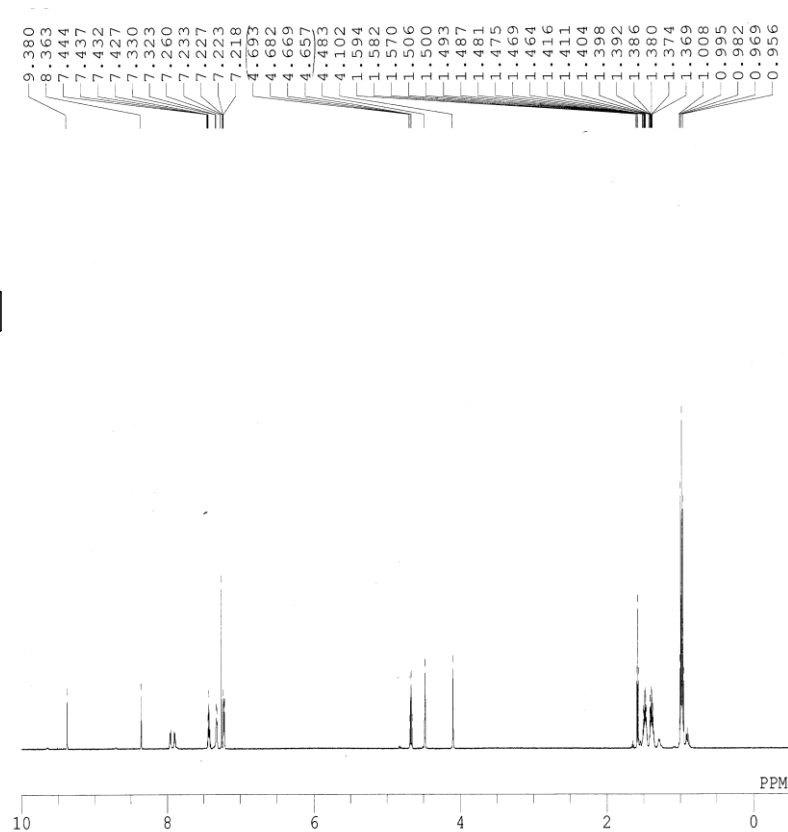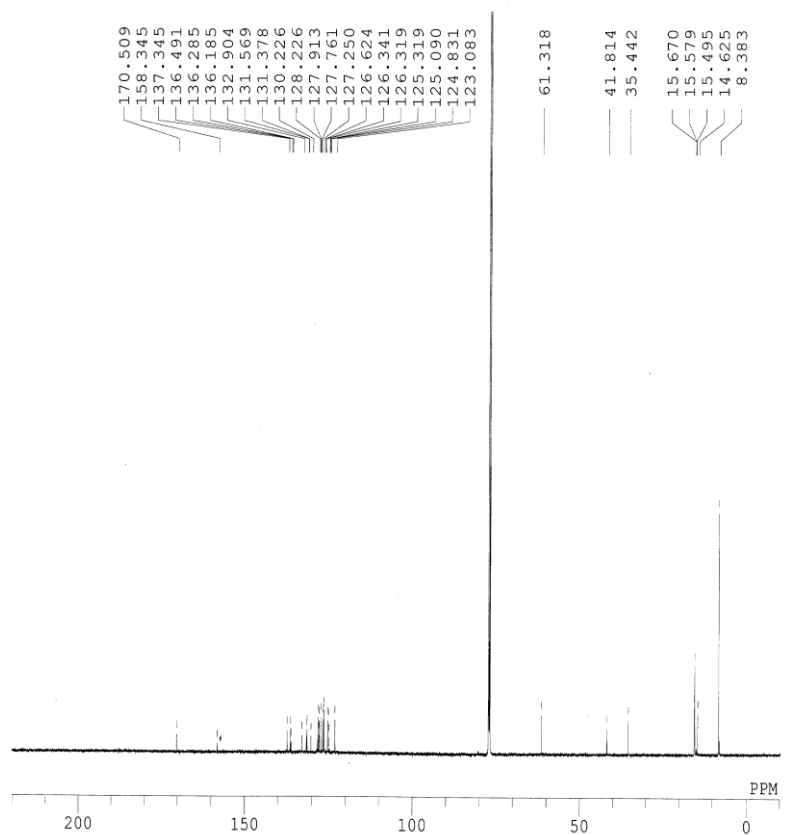

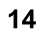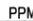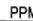

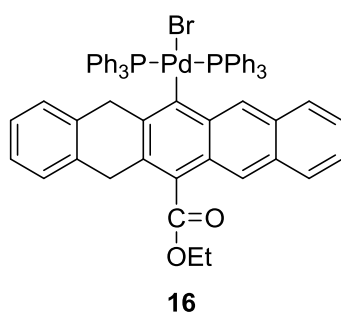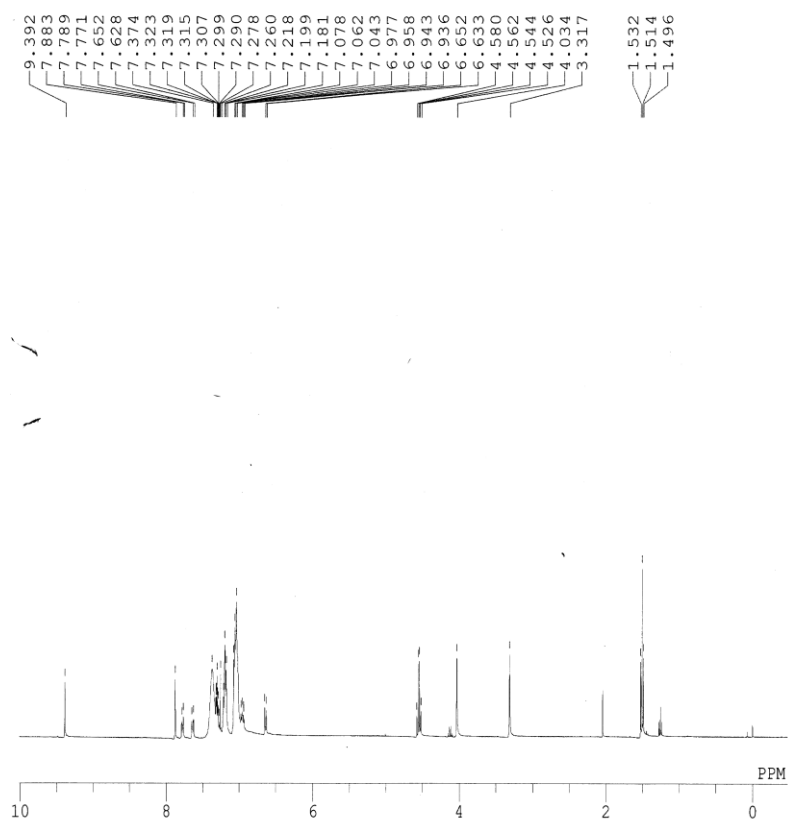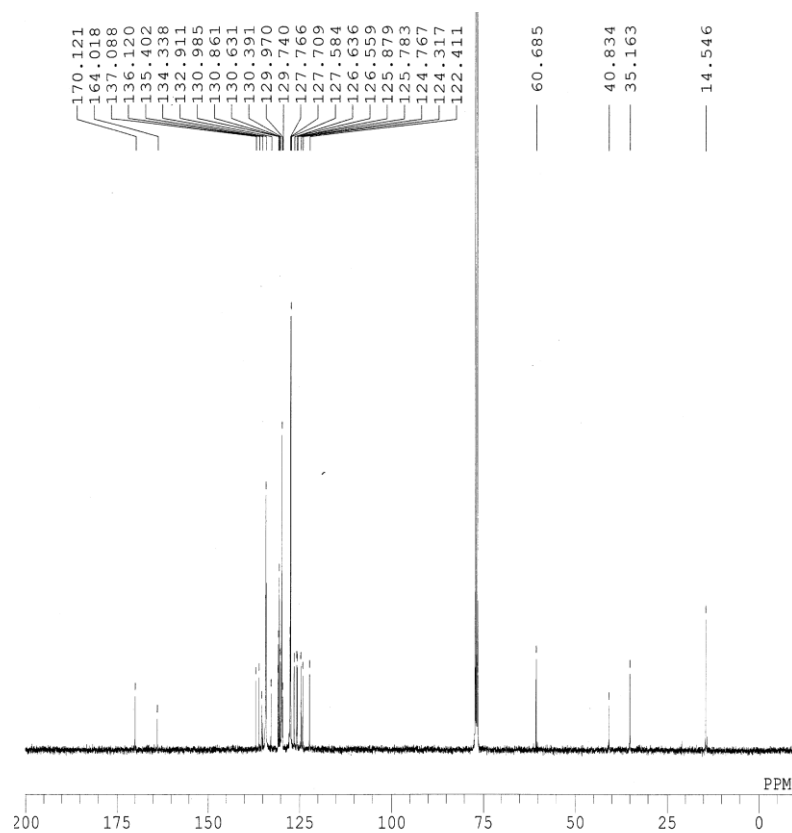

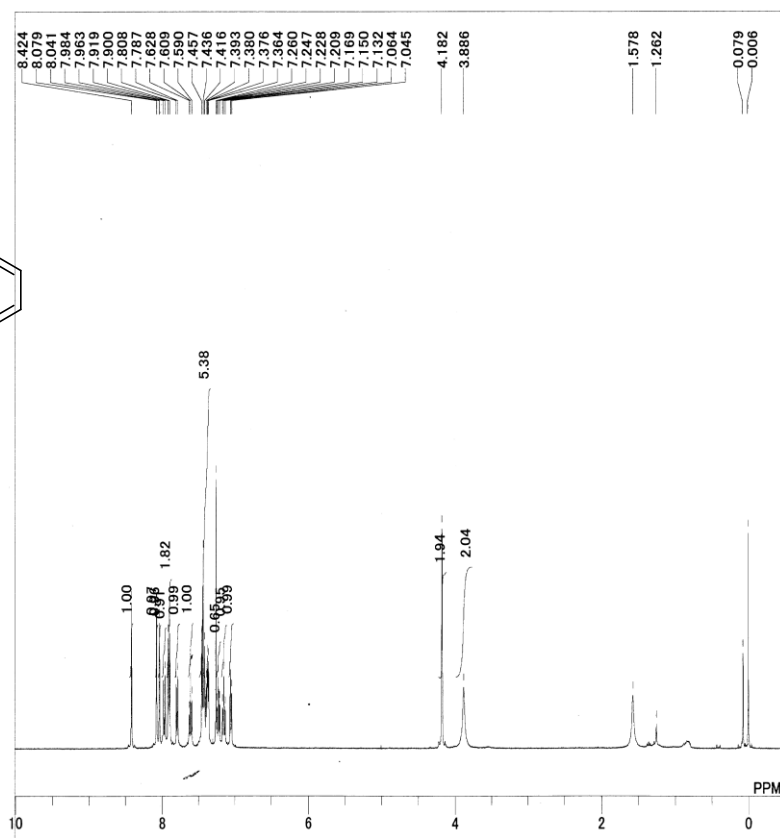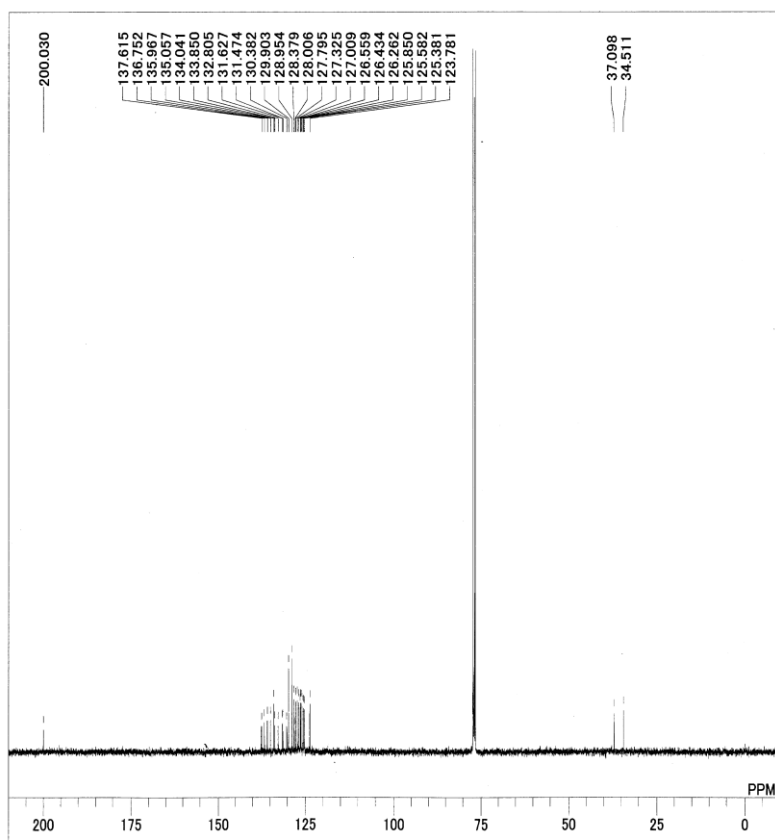

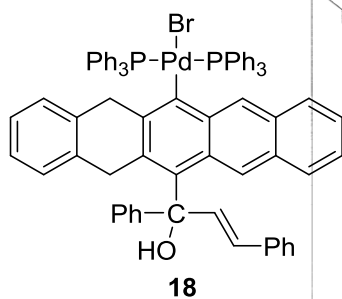



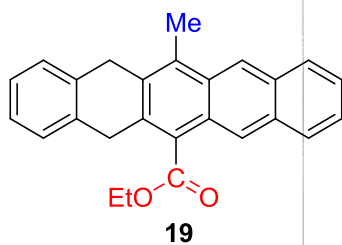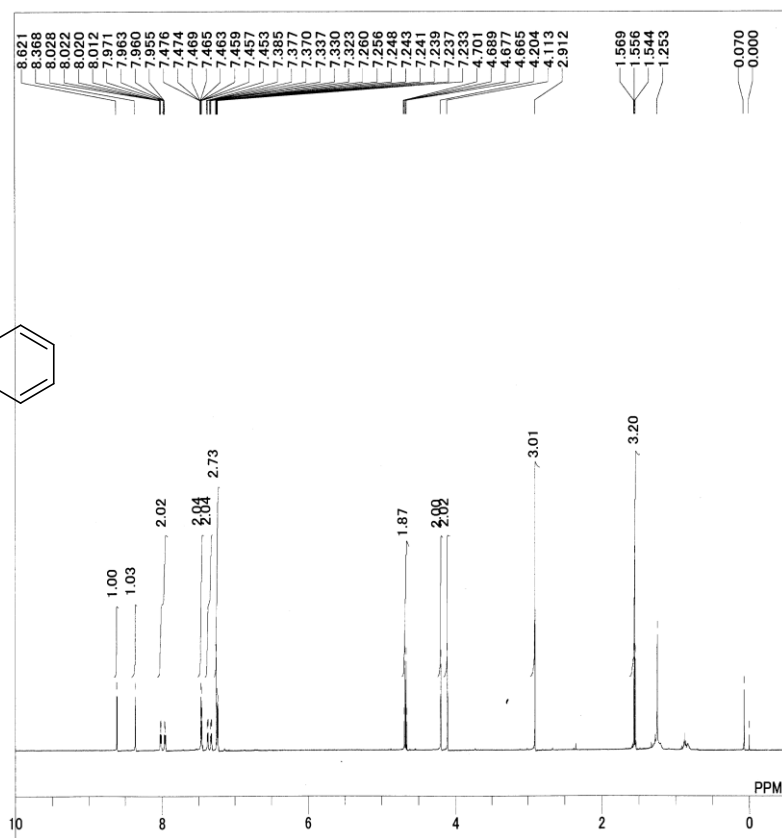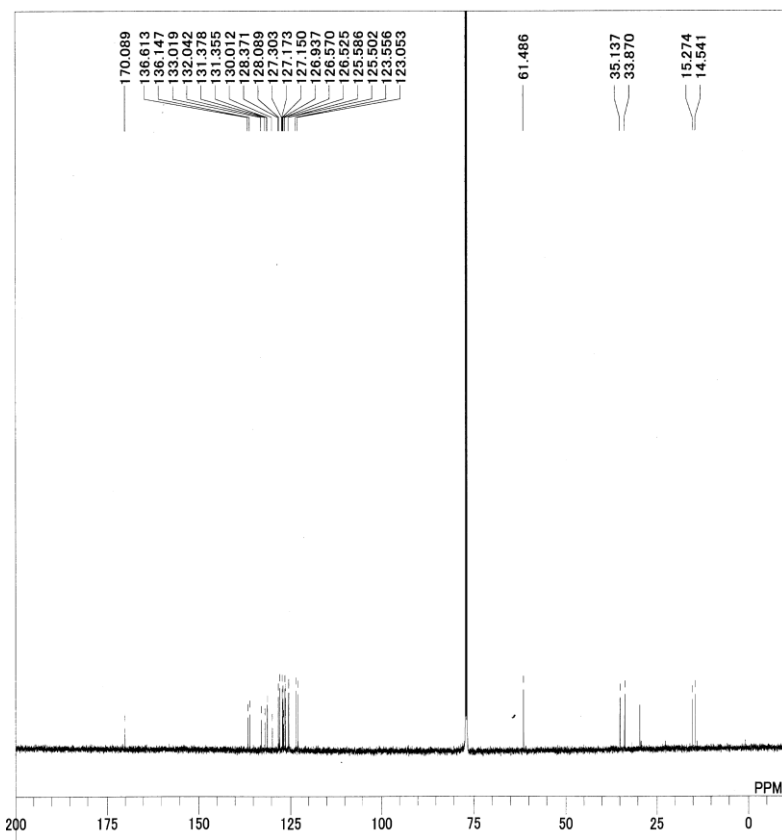

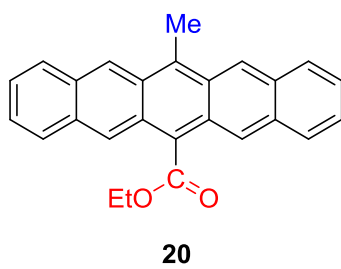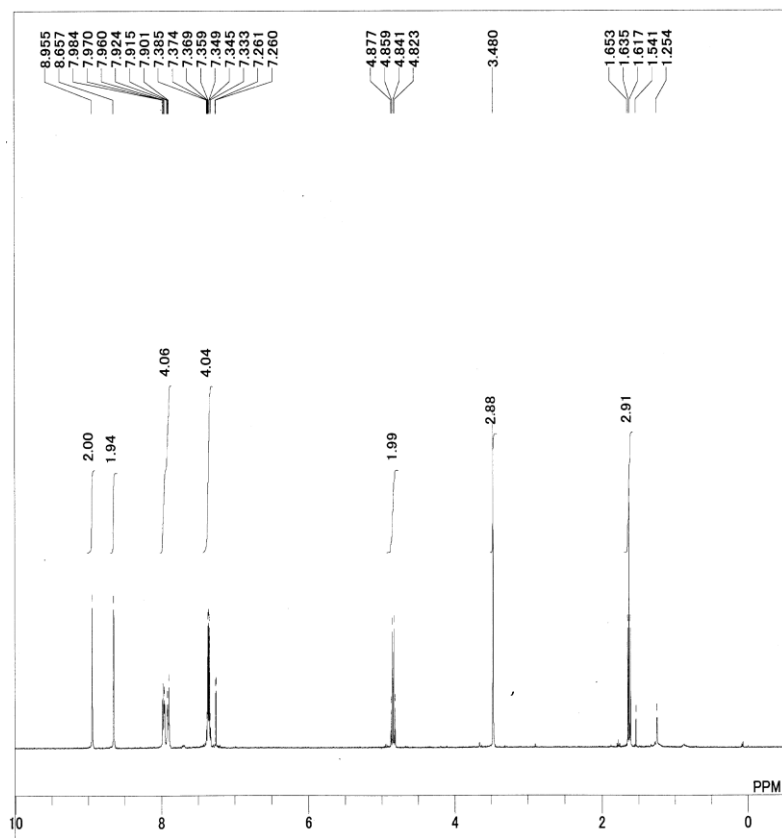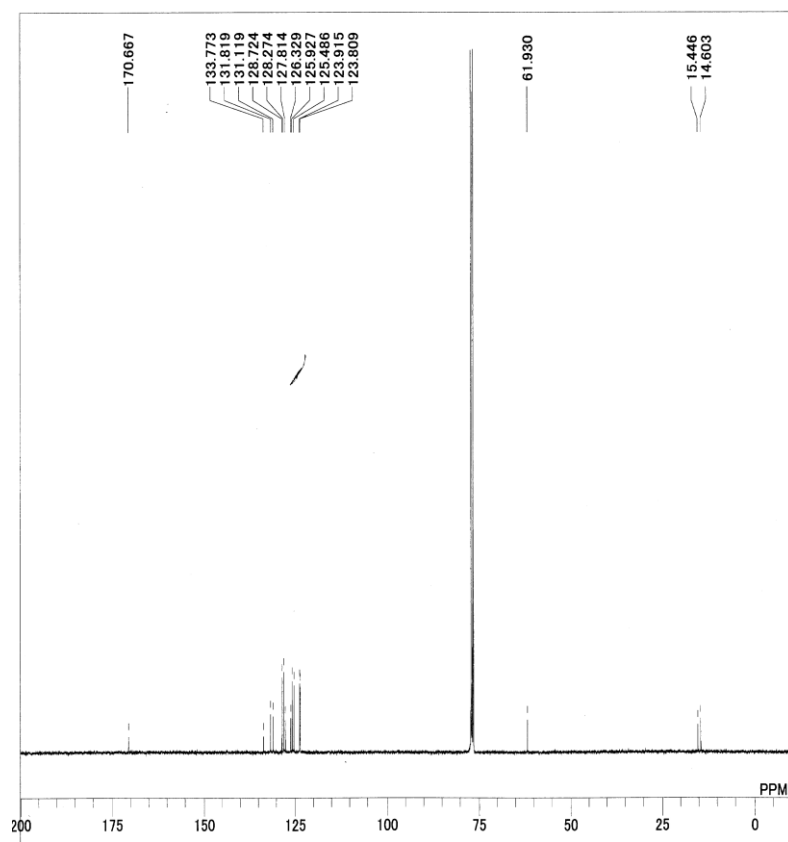

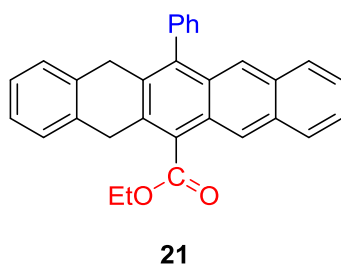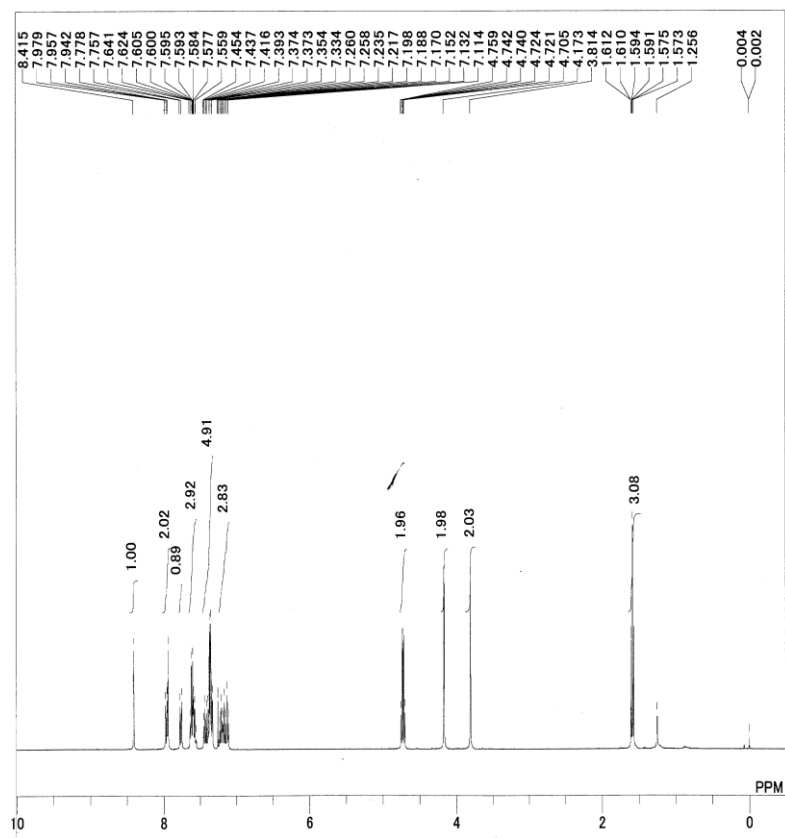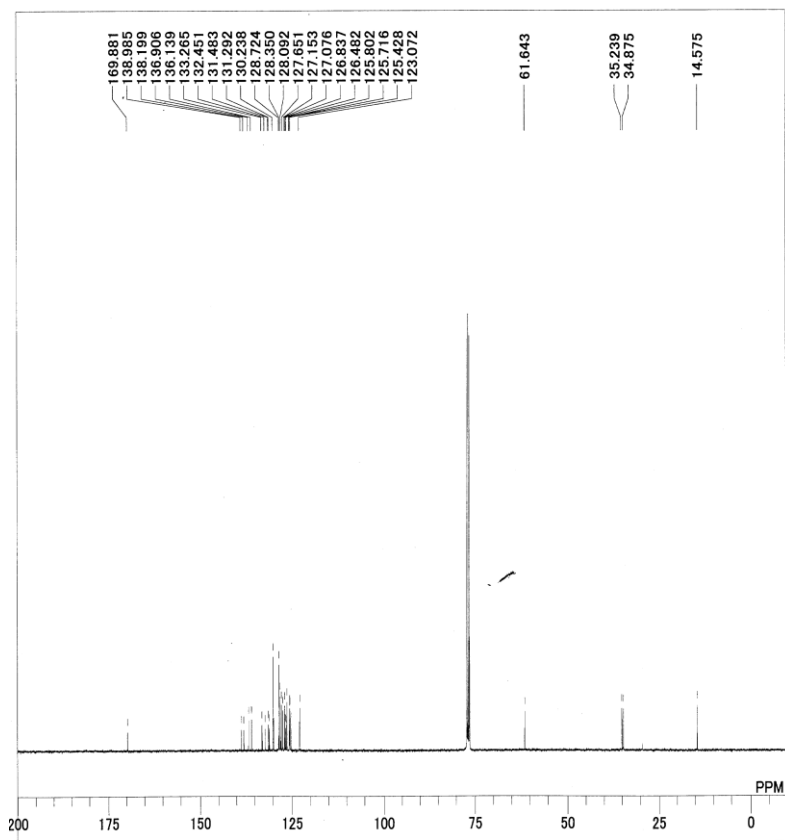

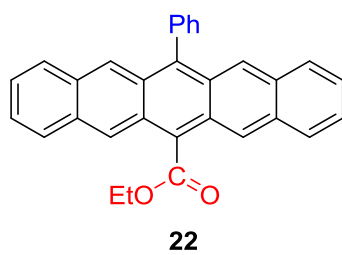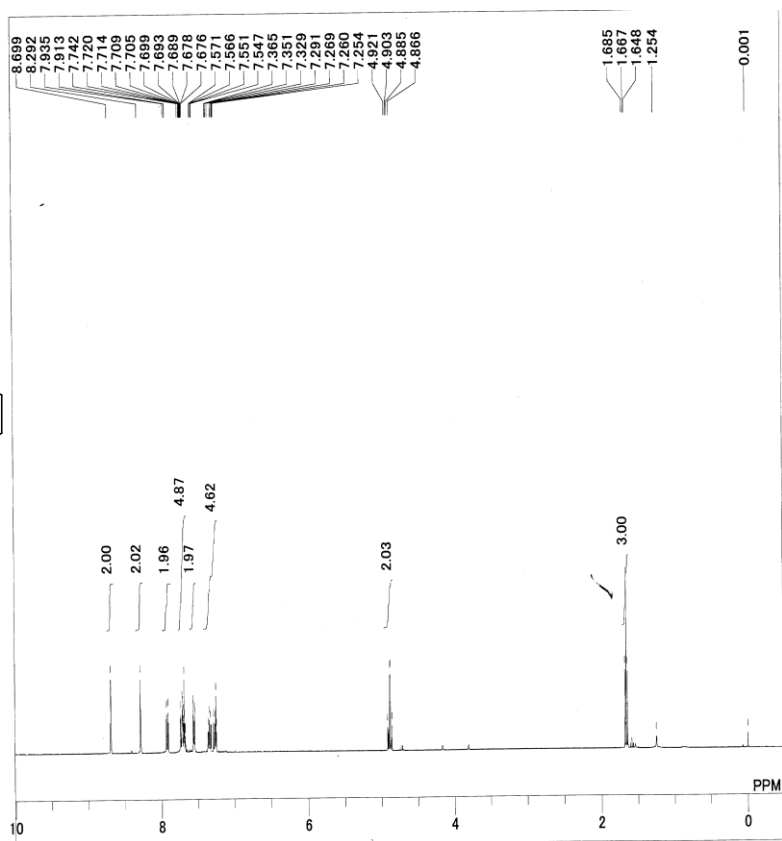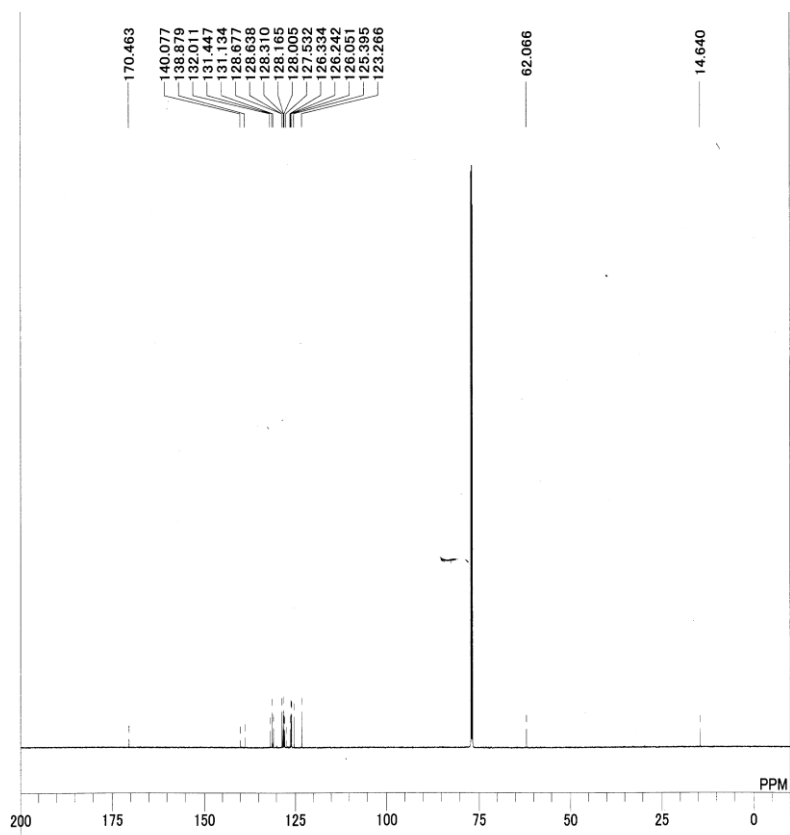

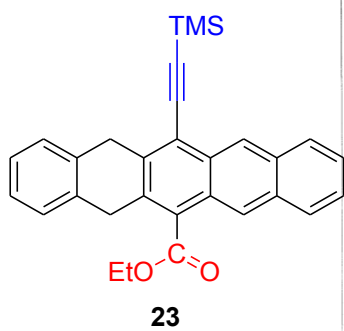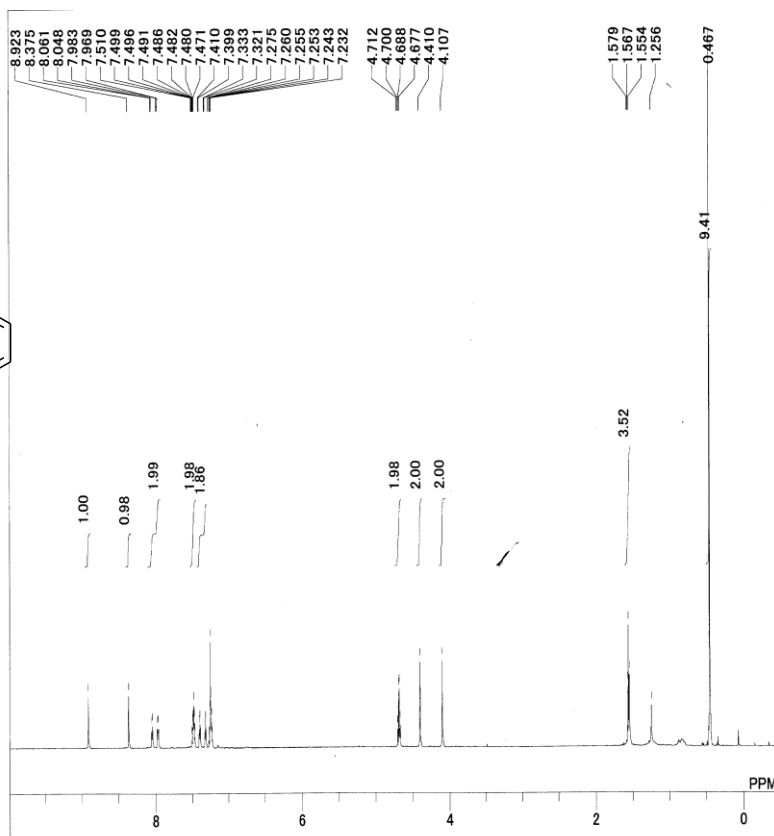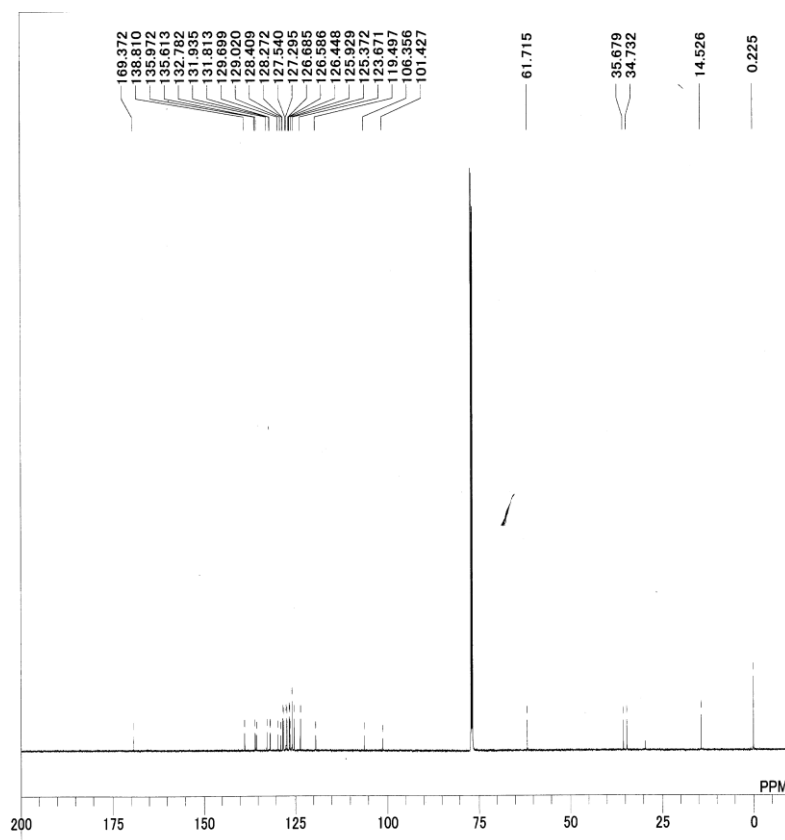

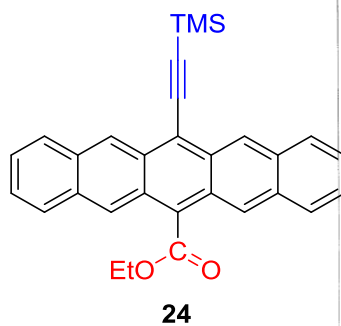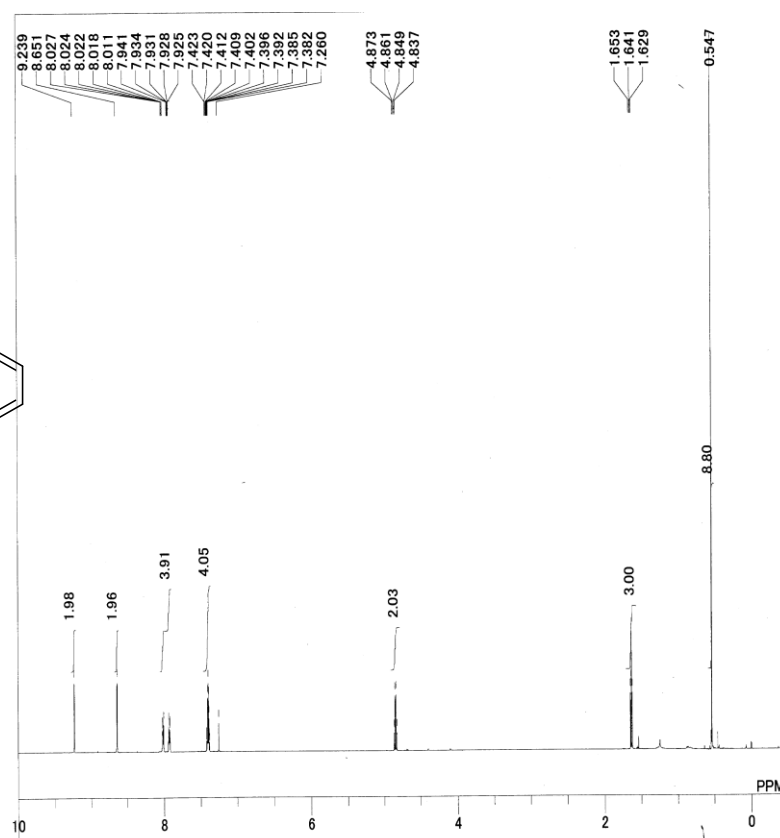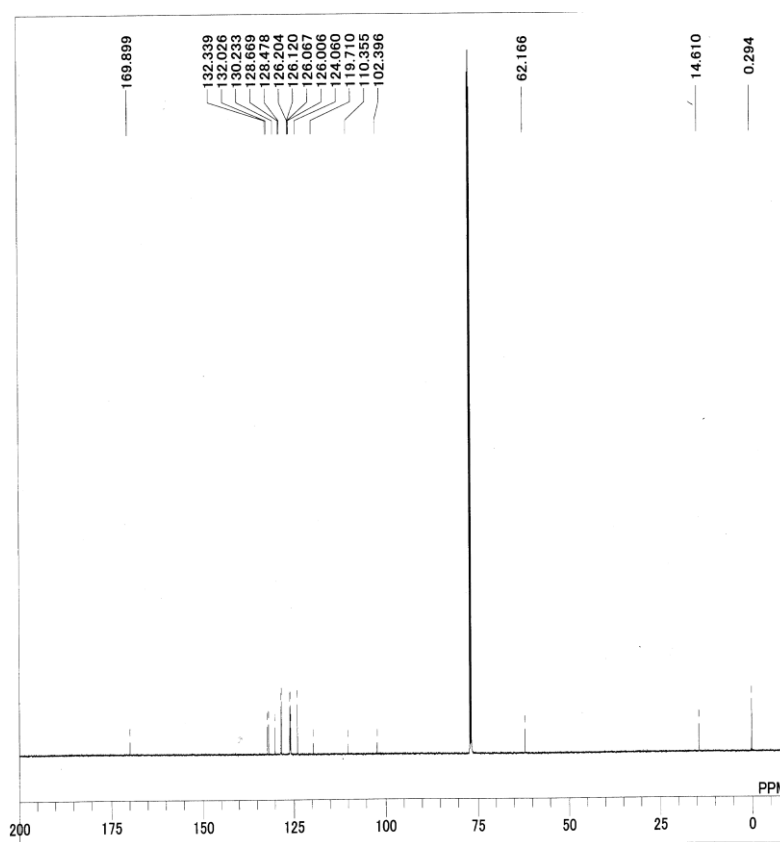

Supplement: c7cc09535j1.pdf [file c7cc09535j1.pdf]
